# Supplementary material
Source: publisher figshare collection journal article supplement (https://tandf.figshare.com/ndownloader/files/17544785)
Supplement: Supplementary file 1 [file 17544785]

**Synthesis and nematicidal activities of 1,2,3-benzotriazin-4-one containing 4,5- dihydrothiazole-2-thiol derivatives against *Meloidogyne incognita***

**Xiulei Chena, Zhen Zhoua, Zhong Li a, b, and Xiaoyong Xua, b, c**

*aShanghai Key Laboratory of Chemical Biology, School of Pharmacy, East China University of Science and Technology, Shanghai 200237, China*

*bShanghai Collaborative Innovation Center for Biomanufacturing Technology, 130 Meilong Road, Shanghai 200237, China*

E-mail: [xyxu@ecust.edu.cn](mailto:xyxu@ecust.edu.cn)

# Supplemental Materials

## 1H NMR, 13C NMR, 19F NMR, HRMS and mp data of compounds A2-A18 and B1-B5.

*3-(3-((4,5-dihydrothiazol-2-yl)thio)propyl)-5-methoxybenzo[d][1,2,3]triazin-4(3H)-one (****A2****):* white solid, yield 65%; mp: 125.0-125.5 ºC; 1H NMR (400 MHz, CDCl3) δ 7.85 (t, *J* = 8.2 Hz, 1H, Ph-H), 7.70 (d, *J* = 8.2 Hz, 1H, Ph-H), 7.18 (d, *J* = 8.2 Hz, 1H, Ph-H), 4.54 (t, *J* = 6.8 Hz, 2H,

CH2), 4.16 (t, *J* = 8.0 Hz, 2H, CH2), 4.04 (s, 3H, CH2), 3.37 (t, *J* = 8.0 Hz, 2H, CH2), 3.21 (t, *J* = 7.0 Hz, 2H, CH2), 2.34 (p, *J* = 6.8 Hz, 2H, CH2) ppm; 13C NMR (100 MHz, CDCl3) δ 158.78 (C=N), 153.87 (C=O), 146.53 (Ph-C), 135.46 (Ph-C), 120.10 (Ph-C), 112.81 (Ph-C), 109.51 (Ph-

C), 63.93 (CH2), 56.70 (CH3), 48.66 (CH2), 35.37 (CH2), 29.82 (CH2), 28.62 (CH2) ppm. HRMS

*m/z*(ES+) calcd. for C14H17N4O2S2 (M+H)+, 337.0793; found, 337.0794.

*3-(3-((4,5-dihydrothiazol-2-yl)thio)propyl)-6-methoxybenzo[d][1,2,3]triazin-4(3H)-one (****A3****):* white solid, yield 63%; mp: 121.0-121.8 ºC; 1H NMR (400 MHz, CDCl3) δ 8.06 (d, *J* = 9.0 Hz, 1H, Ph-H), 7.65 (d, *J* = 2.8 Hz, 1H, Ph-H), 7.47 (dd, *J* = 9.0, 2.8 Hz, 1H, Ph-H), 4.57 (t, *J* = 7.0

Hz, 2H, CH2), 4.15 (t, *J* = 8.0 Hz, 2H, CH2), 3.98 (s, 3H) (CH3), 3.37 (t, *J* = 8.0 Hz, 2H, CH2), 3.20 (t, *J* = 7.0 Hz, 2H, CH2), 2.35 (p, *J* = 7.0 Hz, 2H, CH2) ppm. 13C NMR (100 MHz, CDCl3) δ

165.11 (C=N), 162.55 (C=O), 155.70 (Ph-C), 139.47 (Ph-C), 130.27 (Ph-C), 124.94 (Ph-C),

121.60 (Ph-C), 104.09 (Ph-C), 64.08 (CH2), 56.23 (CH3), 48.44 (CH2), 35.44 (CH2), 29.67 (CH2),

28.80 (CH2) ppm. HRMS *m/z* (EI+) calcd. for C14H16N4O2S2 (M), 336.0715; found, 336.0710.

*3-(3-((4,5-dihydrothiazol-2-yl)thio)propyl)-7-methoxybenzo[d][1,2,3]triazin-4(3H)-one (****A4****):* white solid, yield 60%; mp: 97.9-98.2 ºC; 1H NMR (400 MHz, CDCl3) δ 8.23 (d, *J* = 8.8 Hz, 1H, Ph-H), 7.47 (d, *J* = 2.4 Hz, 1H, Ph-H), 7.33 (dd, *J* = 8.8, 2.4 Hz, 1H, Ph-H), 4.56 (t, *J* = 7.0 Hz,

2H, CH2), 4.14 (t, *J* = 8.0 Hz, 2H, CH2), 4.00 (s, 3H) (CH3), 3.36 (t, *J* = 8.0 Hz, 2H, CH2), 3.20 (t, *J* = 7.0 Hz, 2H, CH2), 2.35 (p, *J* = 7.0 Hz, 2H, CH2) ppm; 13C NMR (100 MHz, CDCl3) δ 164.95 (C=N), 164.67 (C=O), 155.26 (Ph-C), 146.47 (Ph-C), 126.67 (Ph-C), 122.40 (Ph-C), 113.40 (Ph-

C), 108.30 (Ph-C), 64.12 (CH2), 56.03 (CH3), 48.47 (CH2), 35.44 (CH2), 29.63 (CH2), 28.84 (CH2) ppm. HRMS *m/z* (EI+) calcd. for C14H16N4O2S2 (M), 336.0715; found, 336.0708.

*3-(3-((4,5-dihydrothiazol-2-yl)thio)propyl)-8-methoxybenzo[d][1,2,3]triazin-4(3H)-one (****A5****):* white solid, yield 66%; mp: 114.2-114.8 ºC; 1H NMR (400 MHz, CDCl3) δ 7.88 (d, *J* = 8.0 Hz, 1H, Ph-H), 7.73 (t, *J* = 8.0 Hz, 1H, Ph-H), 7.35 (d, *J* = 8.0 Hz, 1H, Ph-H), 4.59 (t, *J* = 6.8 Hz, 2H,

CH2), 4.14 (t, *J* = 8.0 Hz, 2H, CH2), 4.11 (s, 3H) (CH3), 3.36 (t, *J* = 8.0 Hz, 2H, CH2), 3.19 (t, *J* = 7.2 Hz, 2H, CH2), 2.35 (p, *J* = 7.0 Hz, 2H, CH2) ppm; 13C NMR (100 MHz, CDCl3) δ 164.97 (C=N), 155.65 (C=O or Ph-H), 155.40 (C=O or Ph-H), 134.86 (Ph-C), 133.33 (Ph-C), 121.02 (Ph-

C), 115.92 (Ph-C), 115.10 (Ph-C), 64.09 (CH2), 56.62 (CH3), 48.49 (CH2), 35.42 (CH2), 29.60 (CH2), 28.70 (CH2) ppm. HRMS *m/z* (EI+) calcd. for C14H16N4O2S2 (M), 336.0715; found, 336.0713.

*3-(3-((4,5-dihydrothiazol-2-yl)thio)propyl)-5-nitrobenzo[d][1,2,3]triazin-4(3H)-one (****A6****):* yellow solid, yield 61%; mp: 103.2-103.5 ºC; 1H NMR (400 MHz, CDCl3) δ 8.40 – 8.28 (m, 1H, Ph-H), 8.07 (t, *J* = 8.0 Hz, 1H, Ph-H), 7.89 – 7.76 (m, 1H, Ph-H), 4.58 (t, *J* = 7.0 Hz, 2H, CH2),

4.11 (t, *J* = 8.0 Hz, 2H, CH2), 3.37 (t, *J* = 8.0 Hz, 2H, CH2), 3.19 (t, *J* = 7.0 Hz, 2H, CH2), 2.35 (p, *J* = 7.0 Hz, 2H, CH2) ppm; 13C NMR (100 MHz, CDCl3) δ 165.06 (C=N), 151.36 (C=O), 147.12 (Ph-C), 144.55 (Ph-C), 135.09 (Ph-C), 131.10 (Ph-C), 125.51 (Ph-C), 111.36 (Ph-C), 63.95 (CH2), 49.18 (CH2), 35.48 (CH2), 29.44 (CH2), 28.45 (CH2) ppm. HRMS *m/z* (ES+) calcd. for C13H14N5O3S2 (M+H)+: 352.0538, found, 352.0539.

*3-(3-((4,5-dihydrothiazol-2-yl)thio)propyl)-6-nitrobenzo[d][1,2,3]triazin-4(3H)-one (****A7****):*

yellow solid, yield 56%; mp: 133.7-133.9 ºC; 1H NMR (400 MHz, DMSO-*d*6) δ 8.86 (d, *J* = 2.4

Hz, 1H, Ph-H), 8.77 (dd, *J* = 8.8, 2.4 Hz, 1H, Ph-H), 8.45 (d, *J* = 8.8 Hz, 1H, Ph-H), 4.50 (t, *J* =

7.2 Hz, 2H, CH2), 4.01 (t, *J* = 8.0 Hz, 2H, CH2), 3.39 (t, *J* = 8.0 Hz, 2H, CH2), 3.18 (t, *J* = 7.2 Hz,

2H, CH2), 2.24 – 2.22 (m, 2H, CH2) ppm; 13C NMR (100 MHz, DMSO-*d*6) δ 162.88 (C=N), 154.21 (C=O), 148.68 (Ph-C), 145.92 (Ph-C), 130.20 (Ph-C), 129.15 (Ph-C), 120.51 (Ph-C), 120.24 (Ph-

C), 63.90 (CH2), 48.49 (CH2), 34.97 (CH2), 28.93 (CH2), 28.27 (CH2) ppm. HRMS *m/z* (ES+) calcd. for C13H13N5NaO3S2 (M+Na)+ 374.0358, found, 374.0358.

*3-(3-((4,5-dihydrothiazol-2-yl)thio)propyl)-7-nitrobenzo[d][1,2,3]triazin-4(3H)-one (****A8****):*

yellow solid, yield 59%; mp: 100.7-100.9 ºC; 1H NMR (400 MHz, CDCl3) δ 9.01 – 8.94 (m, 1H, Ph-H), 8.62 – 8.51 (m, 2H, Ph-H), 4.62 (t, *J* = 7.0 Hz, 2H, CH2), 4.11 (dd, *J* = 10.0, 5.9 Hz, 2H,

CH2), 3.37 (t, *J* = 8.0 Hz, 2H, CH2), 3.21 (t, *J* = 7.0 Hz, 2H, CH2), 2.38 (p, *J* = 7.0 Hz, 2H, CH2) ppm. 13C NMR (100 MHz, CDCl3) δ 164.80 (C=N), 154.13 (C=O), 151.59 (Ph-C), 144.27 (Ph-C),

127.56 (Ph-C), 125.88 (Ph-C), 123.92 (Ph-C), 123.59 (Ph-C), 64.04 (CH2), 49.08 (CH2), 35.48

(CH2), 29.43 (CH2), 28.62 (CH2) ppm. HRMS *m/z* (ES+) calcd. for C13H14N5O3S2 (M+H)+, 352.0538; found, 352.0537.

*3-(3-((4,5-dihydrothiazol-2-yl)thio)propyl)-8-nitrobenzo[d][1,2,3]triazin-4(3H)-one (****A9****):* yellow solid, yield 64%; mp: 70.8-72.1 ºC; 1H NMR (400 MHz, CDCl3) δ 8.62 – 8.48 (m, 1H, Ph- H), 8.35 – 8.15 (m, 1H, Ph-H), 8.05 – 7.87 (m, 1H, Ph-H), 4.75 – 4.41 (m, 2H, CH2), 4.22 – 3.92

(m, 2H, CH2), 3.50 – 3.24 (m, 2H, CH2), 3.26 – 3.05 (m, 2H, CH2), 2.46 – 2.24 (m, 2H, CH2) ppm;

13C NMR (100 MHz, CDCl3) δ 164.55 (C=N), 153.66 (C=O), 146.31 (Ph-C), 135.62 (Ph-C),

132.12 (Ph-C), 129.32 (Ph-C), 128.97 (Ph-C), 120.80 (Ph-C), 64.07 (CH2), 49.12 (CH2), 35.48 (CH2), 29.35 (CH2), 28.59 (CH2) ppm. HRMS *m/z* (ES+) calcd. for C13H14N5O3S2 (M+H)+, 352.0538; found, 352.0539.

1. *chloro-3-(3-((4,5-dihydrothiazol-2-yl)thio)propyl)benzo[d][1,2,3]triazin-4(3H)-one (****A10****):* white solid, yield 65%; mp: 90.0-92.4 ºC;1H NMR (400 MHz, DMSO-*d*6) δ 8.13 (dd, *J* = 8.0, 1.2 Hz, 1H, Ph-H), 8.00 (t, *J* = 8.0 Hz, 1H, Ph-H), 7.93 (dd, *J* = 8.0 , 1.2 Hz, 1H, Ph-H), 4.41 (t, *J* =

6.8 Hz, 2H, CH2), 4.03 (t, *J* = 8.0 Hz, 2H, CH2), 3.41 (t, *J* = 8.0 Hz, 2H, CH2), 3.17 (t, *J* = 7.2 Hz,

2H, CH2), 2.20 (p, *J* = 6.8 Hz, 2H, CH2) ppm; 13C NMR (101 MHz, CDCl3) δ 164.66 (C=N),

153.33 (C=O), 145.86 (Ph-C), 134.54 (Ph-C), 134.29 (Ph-C), 132.99 (Ph-C), 127.49 (Ph-C),

117.03 (Ph-C), 64.08 (CH2), 48.92 (CH2), 35.45 (CH2), 29.54 (CH2), 28.48 (CH2) ppm. HRMS

*m/z* (EI+) calcd. for C13H1335ClN4OS2 (M), 340.0219; found, 340.0215. HRMS *m/z* (EI+) calcd. for C13H1337ClN4OS2 (M), 342.0190; found, 342.0190.

1. *chloro-3-(3-((4,5-dihydrothiazol-2-yl)thio)propyl)benzo[d][1,2,3]triazin-4(3H)-one (****A11****):* white solid, yield 64%; mp: 101.8-102.9 ºC; 1H NMR (400 MHz, CDCl3) δ 8.31 (d, *J* = 2.2 Hz, 1H, Ph-H), 8.10 (d, *J* = 8.8 Hz, 1H, Ph-H), 7.88 (dd, *J* = 8.8, 2.3 Hz, 1H, Ph-H), 4.58 (t, *J* = 7.0

Hz, 2H, CH2), 4.14 (t, *J* = 8.0 Hz, 2H, CH2), 3.37 (t, *J* = 8.0 Hz, 2H, CH2), 3.21 (t, *J* = 7.0 Hz, 2H, CH2), 2.41 – 2.28 (m, 2H, CH2) ppm; 13C NMR (100 MHz, CDCl3) δ 165.64 (C=N), 154.49 (C=O), 142.63 (Ph-C), 138.77 (Ph-C), 135.41 (Ph-C), 129.99 (Ph-C), 124.65 (Ph-C), 120.96 (Ph-C), 63.84 (CH2), 48.73 (CH2), 35.39 (CH2), 29.65 (CH2), 28.72 (CH2) ppm. HRMS *m/z* (ES+) calcd. for C13H1435ClN4OS2 (M+H)+, 341.0298; found, 341.0296. HRMS *m/z* (ES+) calcd. for C13H1437ClN4OS2 (M+H)+, 343.0268; found, 343.0266.

1. *chloro-3-(3-((4,5-dihydrothiazol-2-yl)thio)propyl)benzo[d][1,2,3]triazin-4(3H)-one (****A12****):* white solid, yield 59%; mp: 101.4-101.8 ºC; 1H NMR (400 MHz, DMSO-*d*6) δ 8.33 (d, *J* = 2.0 Hz, 1H, Ph-H), 8.25 (d, *J* = 8.4 Hz, 1H, Ph-H), 7.96 (dd, *J* = 8.4, 2.0 Hz, 1H, Ph-H), 4.45 (t, *J* = 7.2

Hz, 2H, CH2), 4.02 (t, *J* = 8.0 Hz, 2H, CH2), 3.40 (t, *J* = 8.0 Hz, 2H, CH2), 3.16 (t, *J* = 7.2 Hz, 2H, CH2), 2.22 – 2.20 (m, 2H, CH2) ppm, 13C NMR (100 MHz, DMSO-*d*6) δ 162.88 (C=N), 154.36 (C=O), 144.52 (Ph-C), 139.74 (Ph-C), 132.95 (Ph-C), 127.11 (Ph-C), 126.85 (Ph-C), 118.28 (Ph-

C), 63.89 (CH2), 48.17 (CH2), 34.96 (CH2), 28.99 (CH2), 28.36 (CH2) ppm. HRMS *m/z* (ES+)

calcd. for C13H1435ClN4OS2 (M+H)+, 341.0298; found, 341.0296. HRMS *m/z* (ES+) calcd. for C13H1437ClN4OS2 (M+H)+, 343.0268; found, 343.0270.

1. *chloro-3-(3-((4,5-dihydrothiazol-2-yl)thio)propyl)benzo[d][1,2,3]triazin-4(3H)-one (****A13****):* white solid, yield 59%; mp: 100.3-101.0 ºC; 1H NMR (400 MHz, CDCl3) δ 8.25 (dd, *J* = 8.0, 1.2 Hz, 1H, Ph-H), 7.98 (dd, *J* = 7.8, 1.2 Hz, 1H, Ph-H), 7.72 (t, *J* = 7.9 Hz, 1H, Ph-H), 4.60 (t, *J* =

6.8 Hz, 2H, CH2), 4.12 (t, *J* = 8.0 Hz, 2H, CH2), 3.37 (t, *J* = 8.0 Hz, 2H, CH2), 3.20 (t, *J* = 7.1 Hz,

2H, CH2), 2.36 (p, *J* = 6.9 Hz, 2H, CH2) ppm, 13C NMR (100 MHz, CDCl3) δ 164.83 (C=N),

154.63 (C=O), 140.67 (Ph-C), 135.42 (Ph-C), 133.56 (Ph-C), 132.53 (Ph-C), 123.83 (Ph-C),

121.51 (Ph-C), 64.06 (CH2), 48.78 (CH2), 35.46 (CH2), 29.49 (CH2), 28.65 (CH2) ppm. HRMS *m/z* (ES+) calcd. for C13H1435ClN4OS2 (M+H)+, 341.0298; found, 341.0299. HRMS *m/z* (ES+) calcd. for C13H1437ClN4OS2 (M+H)+, 343.0268; found, 343.0269.

*3-(3-((4,5-dihydrothiazol-2-yl)thio)propyl)-7-methylbenzo[d][1,2,3]triazin-4(3H)-one (****A14****):* white solid, yield 25%; mp: 90.0-90.3 ºC; 1H NMR (400 MHz, CDCl3) δ 8.14 (d, *J* = 8.0 Hz, 1H, Ph-H), 7.83 (s, 1H, Ph-H), 7.53 (dd, *J* = 8.0, 1.0 Hz, 1H, Ph-H), 4.49 (t, *J* = 7.0 Hz, 2H, CH2), 4.05

(t, *J* = 8.0 Hz, 2H, CH2), 3.28 (t, *J* = 8.0 Hz, 2H, CH2), 3.12 (t, *J* = 7.2 Hz, 2H, CH2), 2.52 (s, 3H) (CH3), 2.27 (p, *J* = 7.0 Hz, 2H, CH2) ppm; 13C NMR (100 MHz, CDCl3) δ 165.11 (C=N), 155.58 (C=O), 146.11 (Ph-C), 144.45 (Ph-C), 133.88 (Ph-C), 127.77 (Ph-C), 124.87 (Ph-C), 117.42 (Ph-

C), 64.06 (CH2), 48.44 (CH2), 35.43 (CH2), 29.64 (CH2), 28.80 (CH2), 21.97 (CH3) ppm. HRMS

*m/z* (EI+) calcd. for C14H16N4OS2 (M), 320.0766; found, 320.0764.

*3-(3-((4,5-dihydrothiazol-2-yl)thio)propyl)-7-fluorobenzo[d][1,2,3]triazin-4(3H)-one (****A15****):* white solid, yield 67%; mp: 92.5-93.1 ºC; 1H NMR (400 MHz, CDCl3) δ 8.43 – 8.29 (m, 1H, Ph- H), 7.86 – 7.69 (m, 1H, Ph-H), 7.57 – 7.40 (m, 1H, Ph-H), 4.66 – 4.44 (m, 2H, CH2), 4.22 – 3.97

(m, 2H, CH2), 3.45 – 3.30 (m, 2H, CH2), 3.24 – 3.09 (m, 2H, CH2), 2.46 – 2.21 (m, 2H, CH2) ppm.

13C NMR (100 MHz, CDCl3) δ 166.20 (1*J*CF =254.6 Hz) (C-F), 164.91 (C=N), 154.81 (C=O),

146.04 (3*J*CF =11.4 Hz, Ph-C), 128.23 (3*J*CF =9.9 Hz, Ph-C), 121.26 (2*J*CF =23.6 Hz, Ph-C), 116.62

(4*J*CF =2.2 Hz, Ph-C), 113.51 (2*J*CF =22.4 Hz, Ph-C), 64.09 (CH2), 48.69 (CH2), 35.47 (CH2), 29.52 (CH2), 28.74 (CH2) ppm. 19F NMR (376 MHz, CDCl3) δ -100.62 (s) ppm. HRMS *m/z* (ES+) calcd. for C13H14FN4OS2 (M+H)+, 325.0593; found, 325.0593.

*7-bromo-3-(3-((4,5-dihydrothiazol-2-yl)thio)propyl)benzo[d][1,2,3]triazin-4(3H)-one (****A16****):* white solid, yield 61%; mp: 97.6-98.4 ºC; 1H NMR (400 MHz, CDCl3) δ 8.23 (d, *J* = 1.8 Hz, 1H, Ph-H), 8.13 (d, *J* = 8.5 Hz, 1H, Ph-H), 7.82 (dd, *J* = 8.5, 1.9 Hz, 1H, Ph-H), 4.49 (t, *J* = 6.9 Hz,

2H, CH2), 4.05 (t, *J* = 8.0 Hz, 2H, CH2), 3.29 (t, *J* = 8.0 Hz, 2H, CH2), 3.12 (t, *J* = 7.1 Hz, 2H, CH2), 2.27 (p, *J* = 7.0 Hz, 2H, CH2) ppm. 13C NMR (101 MHz, CDCl3) δ 164.98 (C=N), 155.02 (C=O), 144.91 (Ph-C), 135.71 (Ph-C), 130.85 (Ph-C), 129.53 (Ph-C), 126.76 (Ph-C), 118.57 (Ph-

C), 64.06 (CH2), 48.76 (CH2), 35.47 (CH2), 29.53 (CH2), 28.71 (CH2) ppm. HRMS *m/z* (ES+)

calcd. for C13H1479BrN4OS2 (M+H)+, 384.9792; found, 384.9797. HRMS *m/z* (ES+) calcd. for C13H1481BrN4OS2 (M+H)+, 386.9772; found, 386.9770.

*3-(3-((4,5-dihydrothiazol-2-yl)thio)propyl)-7-iodobenzo[d][1,2,3]triazin-4(3H)-one (****A17****):* white solid, yield 58%; mp: 70.6-71.8 ºC; 1H NMR (400 MHz, DMSO-*d6*) δ 8.61 (s, 1H, Ph-H), 8.24 (d, *J* = 8.4 Hz, 1H, Ph-H), 7.97 (d, *J* = 8.4 Hz, 1H, Ph-H), 4.43 (t, *J* = 6.8 Hz, 2H, CH2), 4.02 (t, *J* =

8.0 Hz, 2H, CH2), 3.40 (t, *J* = 8.0 Hz, 2H, CH2), 3.15 (t, *J* = 7.2 Hz, 2H, CH2), 2.29 – 2.08 (m, 2H, CH2) ppm. 13C NMR (100 MHz, DMSO-*d6*) δ 162.88 (C=N), 154.73 (C=O), 144.21 (Ph-C), 141.31 (Ph-C), 136.11 (Ph-C), 126.15 (Ph-C), 118.73 (Ph-C), 103.17 (Ph-C), 63.88 (CH2), 48.16 (CH2), 34.96 (CH2), 28.98 (CH2), 28.34 (CH2) ppm. HRMS *m/z* (ES+) calcd. for C13H13IN4NaOS2 (M+Na)+, 454.9473; found, 454.9474.

*3-(3-((4,5-dihydrothiazol-2-yl)thio)propyl)-7-(trifluoromethyl)benzo[d][1,2,3]triazin-4(3H)-one (****A18****):* brown solid, yield 55%; mp: 72.3-73.0 ºC; 1H NMR (400 MHz, CDCl3) δ 8.40 (d, *J* = 8.4 Hz, 1H, Ph-H) 8.34(s, 1H, Ph-H), 7.92 (d, *J* = 8.4 Hz, 1H, Ph-H), 4.52 (t, *J* = 6.8 Hz, 2H, CH2),

4.03 (t, *J* = 8.0 Hz, 2H, CH2), 3.28 (t, *J* = 8.0 Hz, 2H, CH2), 3.12 (t, *J* = 7.0 Hz, 2H, CH2), 2.29 (p, *J* = 7.0 Hz, 2H, CH2) ppm. 13C NMR (100 MHz, CDCl3) δ 164.74 (C=N), 154.53 (C=O), 143.89 (Ph-C), 136.56 (Ph-C) (q, 2*J*CF =33.9 Hz, Ph-C), 128.28 (q, 3*J*CF = 3.0 Hz, Ph-C), 126.55 (Ph-C),

125.85 (q, 3*J*CF = 3.9 Hz, Ph-C), 122.04 (Ph-C), 122.85( q, 1*J*CF =273.5 Hz) (CF3), 64.08 (CH2),

48.89 (CH2), 35.46 (CH2), 29.45 (CH2), 28.67 (CH2) ppm. 19F NMR (376 MHz, CDCl3) δ -63.26 (s) ppm. HRMS *m/z* (ES+) calcd. for C14H14F3N4OS2 (M+H)+, 375.0561; found, 375.0558.

*3-(3-(2-thioxothiazolidin-3-yl)propyl)benzo[d][1,2,3]triazin-4(3H)-one (****B1****):* white solid, yield 40%; mp: 157.0-158.6 ℃; 1H NMR (400 MHz, CDCl3) δ 8.28 (dd, *J* = 8.0, 1.1 Hz, 1H, Ph-H),

8.10 (d, *J* = 8.0 Hz, 1H, Ph-H), 7.95 – 7.86 (m, 1H, Ph-H), 7.81 – 7.72 (m, 1H, Ph-H), 4.53 – 4.43

(m, 2H, CH2), 4.10 (t, *J* = 7.8 Hz, 2H, CH2), 3.88 (t, *J* = 7.2 Hz, 2H, CH2), 3.31 – 3.22 (m, 2H, CH2), 2.35 – 2.20 (m, 2H, CH2) ppm. 13C NMR (100 MHz, CDCl3) δ 197.35 (C=S), 155.56 (C=O), 144.28 (Ph-C), 134.98 (Ph-C), 132.56 (Ph-C), 128.40 (Ph-C), 125.02 (Ph-C), 119.74 (Ph-C), 56.63 (CH2), 47.27 (CH2), 46.47 (CH2), 27.44 (CH2), 26.29 (CH2) ppm. HRMS *m/z* (EI+) calcd. for C14H14F3N4OS2 (M+H)+, 306.0609; found, 306.0608.

*7-methyl-3-(3-(2-thioxothiazolidin-3-yl)propyl)benzo[d][1,2,3]triazin-4(3H)-one (****B2****):* white

solid, yield 21%; mp: 166.5-166.7℃; 1H NMR (400 MHz, CDCl3) δ 8.23 (d, *J* = 8.0 Hz, 1H, Ph- H), 7.94 (s, 1H, Ph-H), 7.63 (dd, *J* = 8.0, 1.2 Hz, 1H, Ph-H), 4.57 – 4.50 (m, 2H, CH2), 4.16 (t, *J*

= 7.8 Hz, 2H, CH2), 3.95 (t, *J* = 7.2 Hz, 2H, CH2), 3.33 (t, *J* = 7.8 Hz, 2H, CH2), 2.61 (s, 3H) (CH3), 2.39 – 2.27 (m, 2H, CH2) ppm. 13C NMR (101 MHz, CDCl3) δ 197.34 (C=S), 155.62 (C=O),

146.34 (Ph-C), 144.52 (Ph-C), 134.09 (Ph-C), 127.93 (Ph-C), 124.85 (Ph-C), 117.39 (Ph-C), 56.63

(CH2), 47.16 (CH2), 46.47 (CH2), 27.44 (CH2), 26.31 (CH2), 22.00 (CH2) ppm. HRMS *m/z* (EI+) calcd. for C13H14N4OS2 (M), 306.0609; found, 306.0608.

*7-fluoro-3-(3-(2-thioxothiazolidin-3-yl)propyl)benzo[d][1,2,3]triazin-4(3H)-one (****B3****):* white solid, yield 35%; mp: 196.8-197.3℃; 1H NMR (400 MHz, CDCl3) δ 8.41 – 8.33 (m, 1H, Ph-H), 7.83 – 7.76 (m, 1H, Ph-H), 7.57 – 7.49 (m, 1H, Ph-H), 4.59 – 4.46 (m, 2H, CH2), 4.16 (t, *J* = 7.8

Hz, 2H, CH2), 3.95 (t, *J* = 7.2 Hz, 2H, CH2), 3.34 (t, *J* = 7.8 Hz, 2H, CH2), 2.40 – 2.26 (m, 2H, CH2) ppm. 13C NMR (100 MHz, CDCl3) δ 197.41 (C=S), 166.28 (1*J*CF= 256.2 Hz, Ph-C), 154.80

(C=O), 146.07 (3*J*CF= 11.6 Hz, Ph-C), 128.19 (3*J*CF= 9.9 Hz, Ph-C), 121.45 (2*J*CF= 23.2 Hz, Ph-C),

116.56 (4*J*CF= 2.2 Hz, Ph-C), 113.66 (2*J*CF= 22.5 Hz, Ph-C), 56.59 (CH2), 47.36 (CH2), 46.38 (CH2),

27.42 (CH2), 26.27 (CH2) ppm. 19F NMR (376 MHz, CDCl3) δ -100.24 (s) ppm. HRMS *m/z* (EI+) calcd. for C13H13FN4OS2 (M), 324.0515; found, 324.0513.

*5-chloro-3-(3-(2-thioxothiazolidin-3-yl)propyl)benzo[d][1,2,3]triazin-4(3H)-one (****B4****):* white solid, yield 30%; mp: 176.4-176.8 ℃; 1H NMR (400 MHz, CDCl3) δ 8.07 (dd, *J* = 8.0, 1.2 Hz, 1H, Ph-H), 7.84 (t, *J* = 8.0 Hz, 1H, Ph-H), 7.78 (dd, *J* = 8.0, 1.2 Hz, 1H, Ph-H), 4.54 – 4.46 (m, 2H,

CH2), 4.17 (t, *J* = 8.0 Hz, 2H, CH2), 3.96 (t, *J* = 7.2 Hz, 2H, CH2), 3.34 (t, *J* = 8.0 Hz, 2H, CH2), 2.40 – 2.25 (m, 2H, CH2) ppm. 13C NMR (100 MHz, CDCl3) δ 197.38 (C=S), 153.56 (C=O),

146.03 (Ph-C), 134.70 (Ph-C), 134.56 (Ph-C), 133.20 (Ph-C), 127.71 (Ph-C), 117.14 (Ph-C), 56.58

(CH2), 47.76 (CH2), 46.44 (CH2), 27.42 (CH2), 26.11 (CH2) ppm. HRMS *m/z* (EI+) calcd. for C13H1335ClN4OS2 (M), 340.0219; found, 340.0222.

*7-bromo-3-(3-(2-thioxothiazolidin-3-yl)propyl)benzo[d][1,2,3]triazin-4(3H)-one (****B5****):* white solid, yield 8%; mp: 197.5-198.7 ℃; 1H NMR (400 MHz, CDCl3) δ 8.25 (d, *J* = 1.8 Hz, 1H, Ph- H), 8.13 (d, *J* = 8.5 Hz, 1H, Ph-H), 7.84 (dd, *J* = 8.5, 1.8 Hz, 1H, Ph-H), 4.54 – 4.36 (m, 2H, CH2),

4.09 (t, *J* = 7.7 Hz, 2H, CH2), 3.88 (t, *J* = 7.0 Hz, 2H, CH2), 3.26 (t, *J* = 7.7 Hz, 2H, CH2), 2.33 –

2.19 (m, 2H, CH2) ppm. 13C NMR (100 MHz, CDCl3) δ 196.39 (C=S), 154.00 (C=O), 143.91 (Ph- C), 134.89 (Ph-C), 129.95 (Ph-C), 128.70 (Ph-C), 125.68 (Ph-C), 117.50 (Ph-C), 55.59 (CH2), 46.40 (CH2), 45.36 (CH2), 26.42 (CH2), 25.21 (CH2) ppm. HRMS *m/z* (EI+) calcd. for C13H1379BrN4OS2 (M), 383.9714; found, 383.9712. HRMS *m/z* (EI+) calcd. for C13H1381BrN4OS2 (M), 385.9694; found, 385.9697.

##
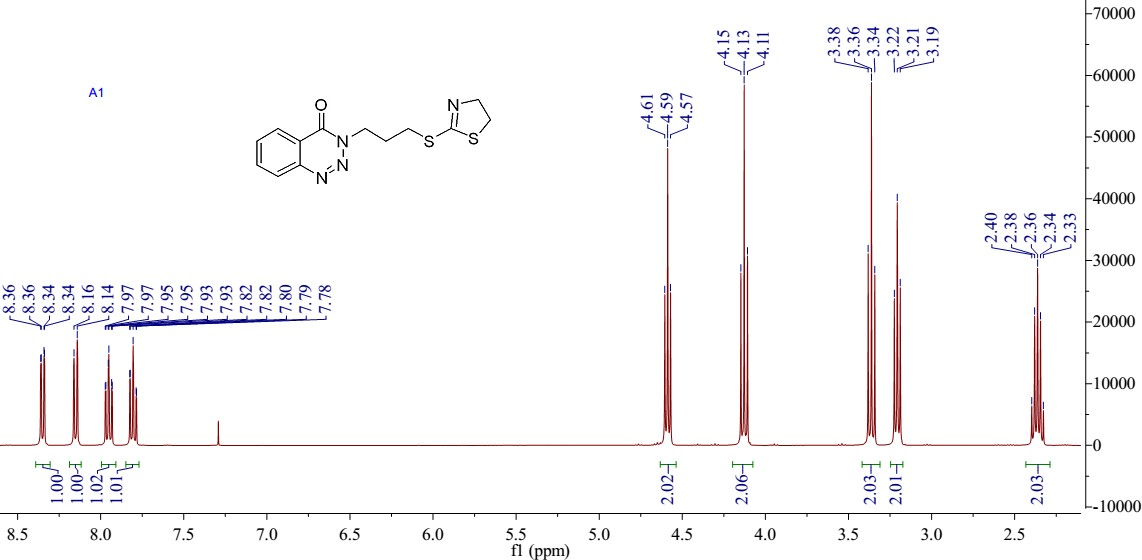

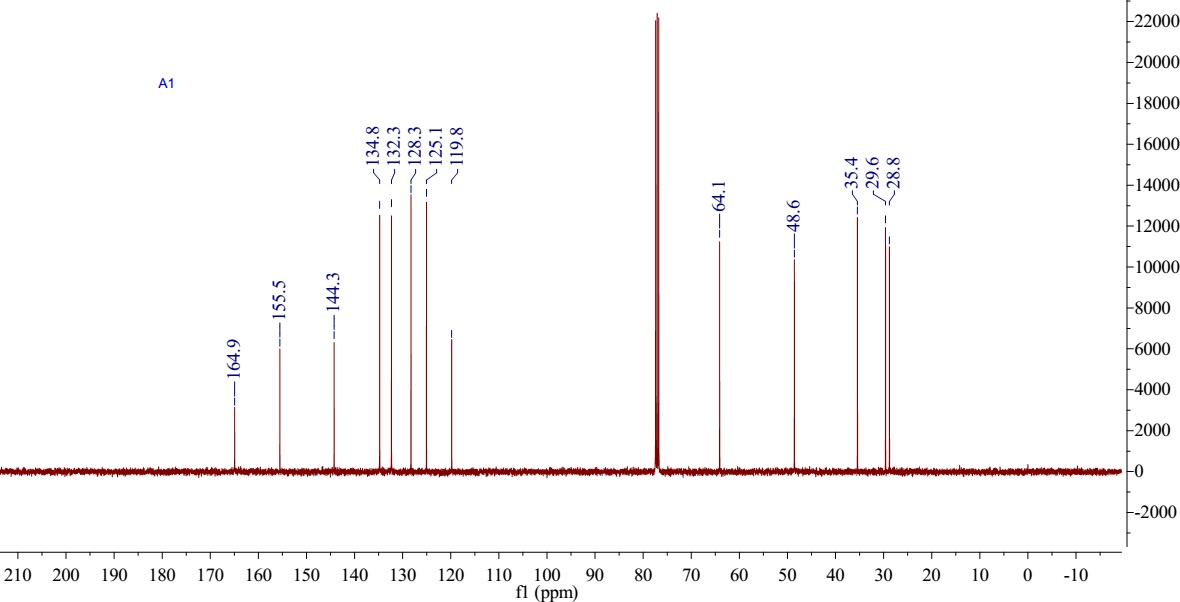
1H NMR, 13C NMR and HRMS spectrum of the title compounds


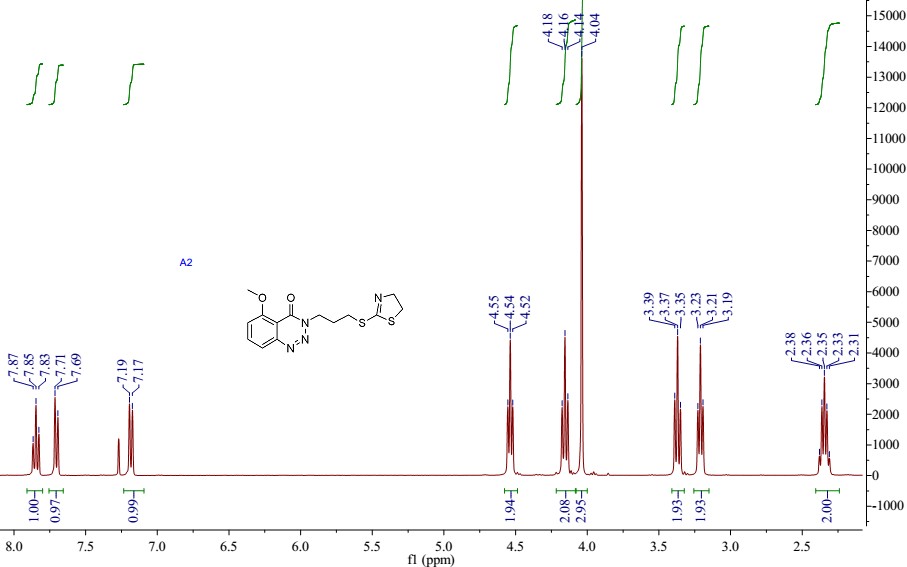


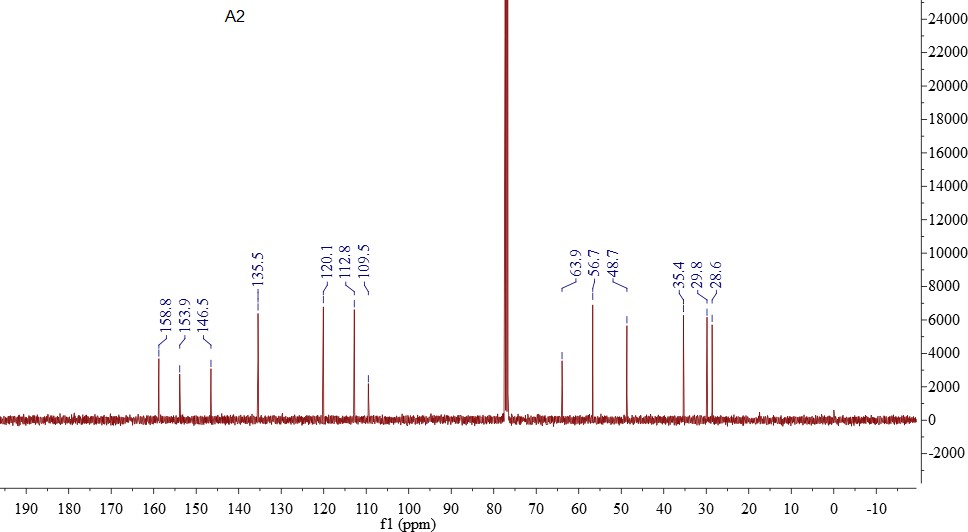


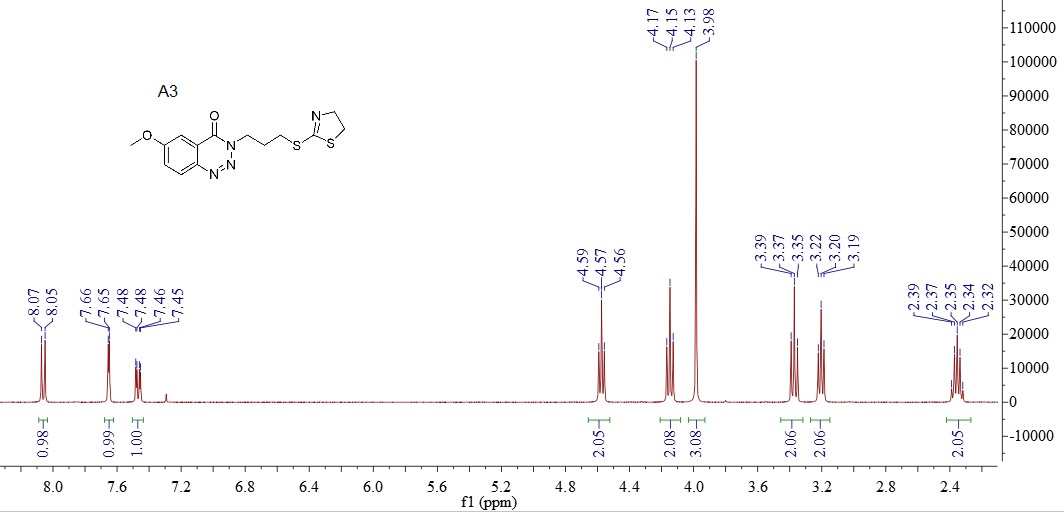


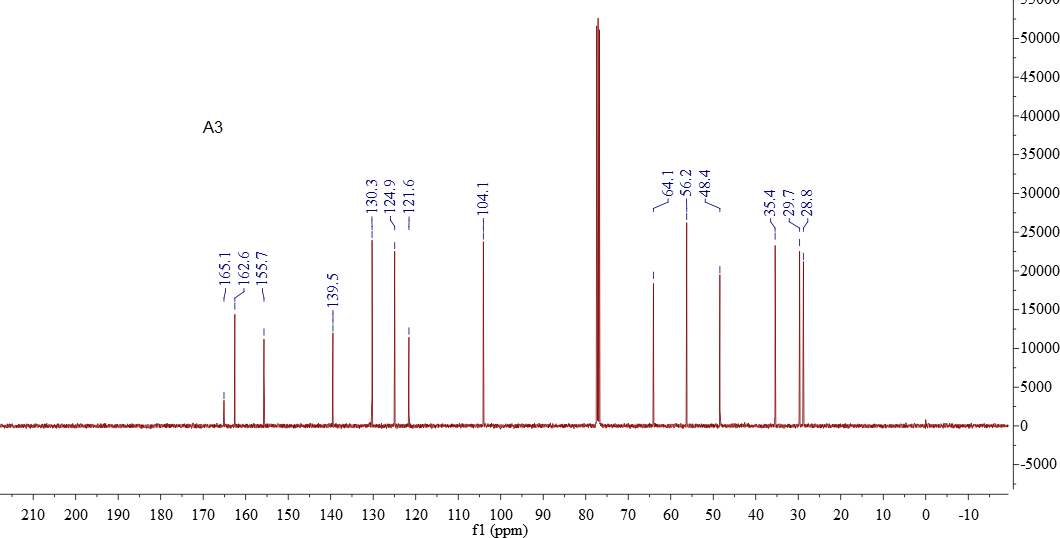


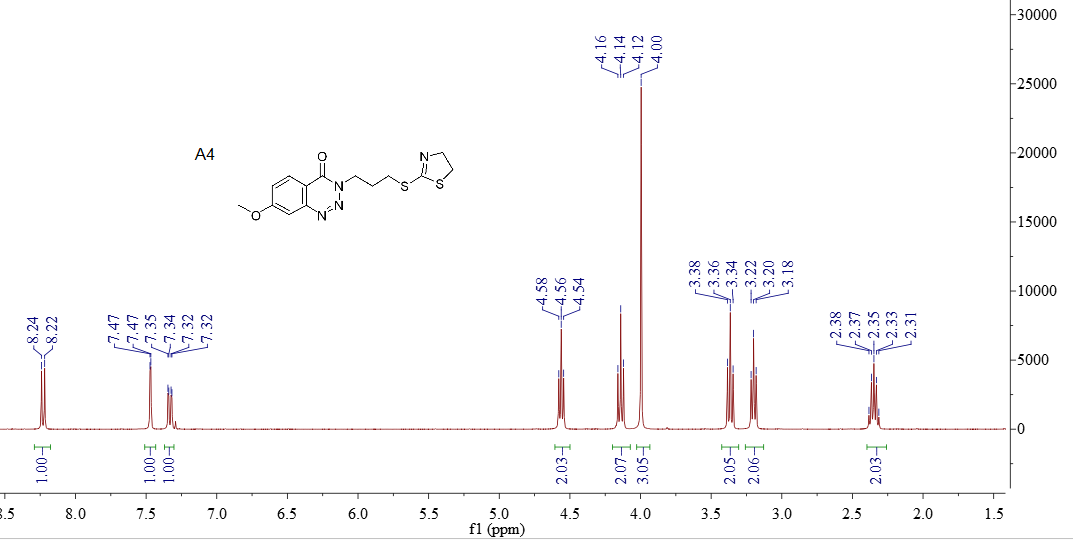


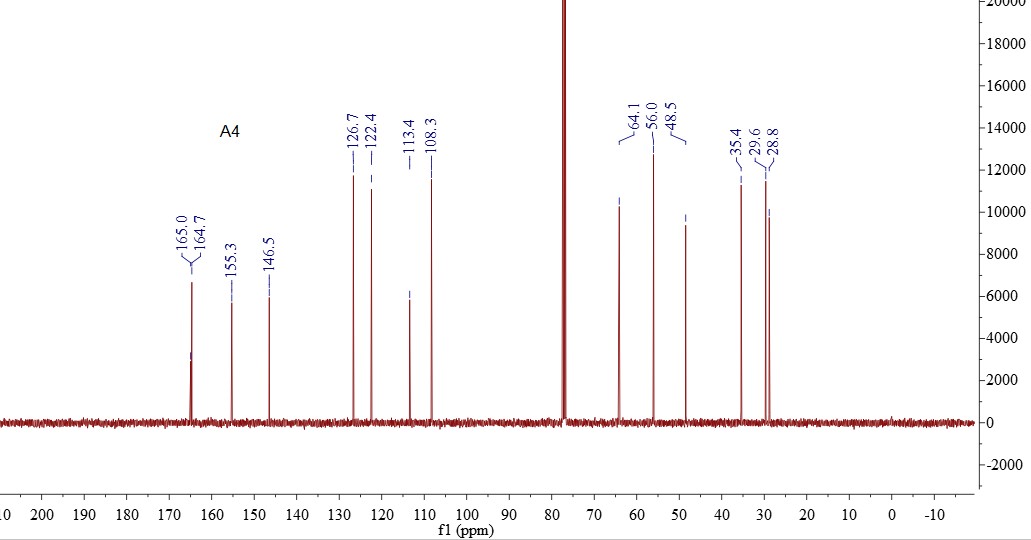


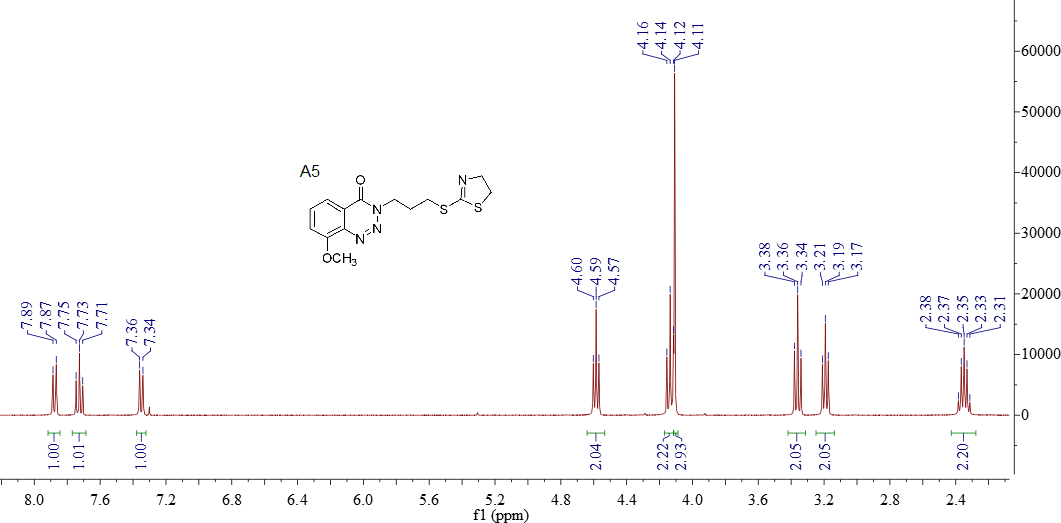


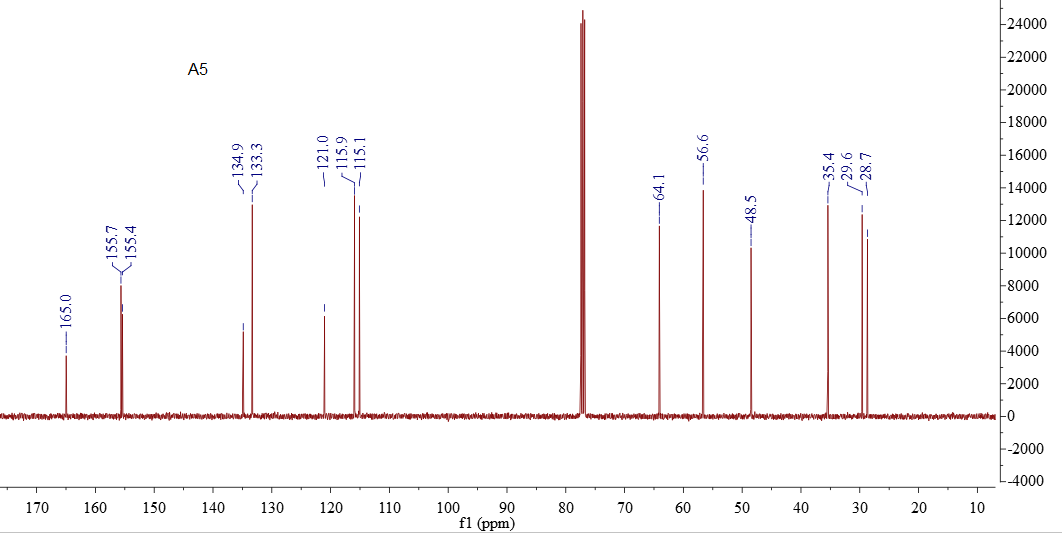


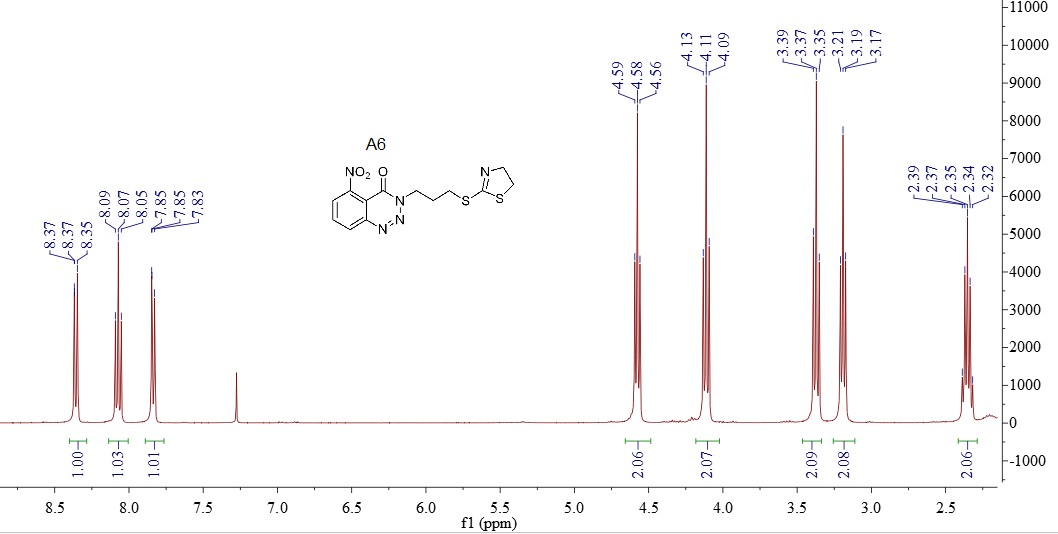


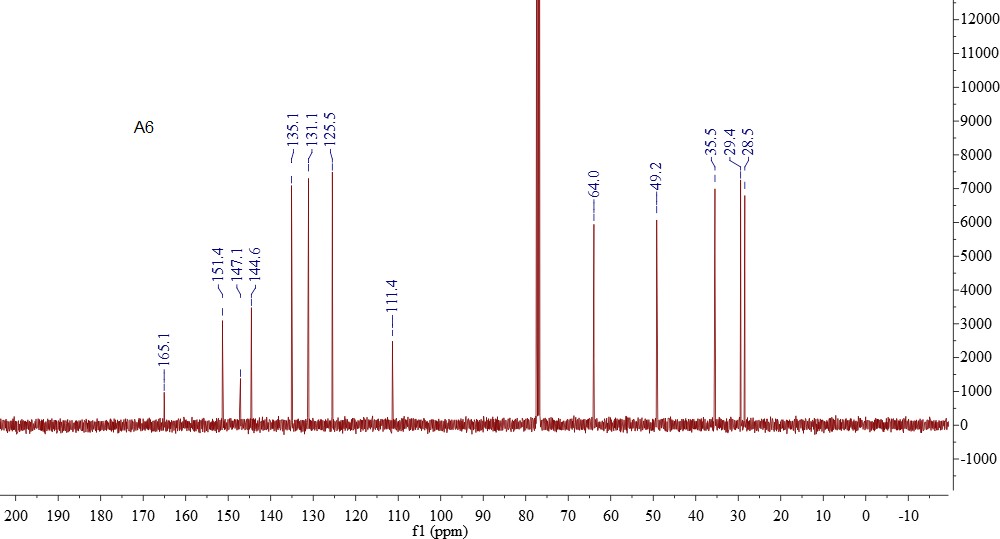


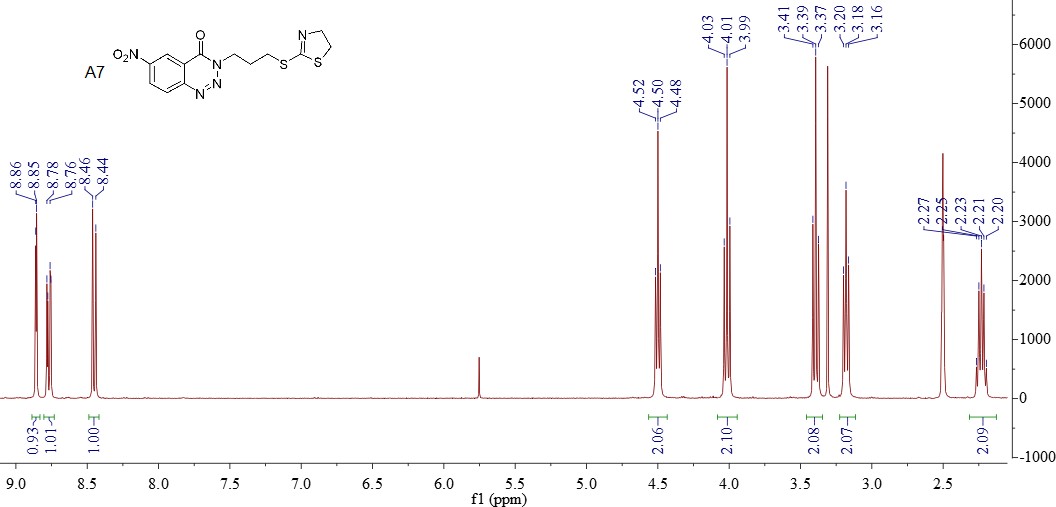


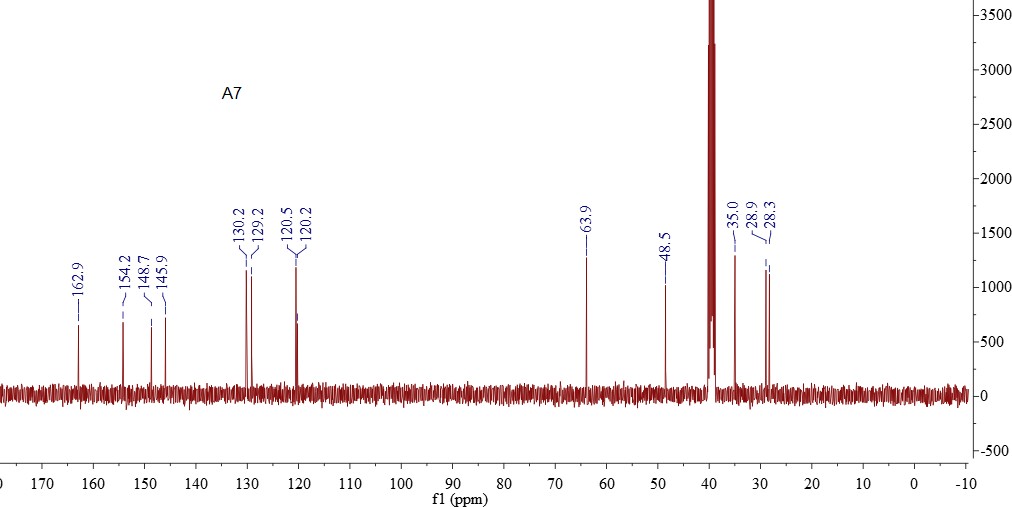


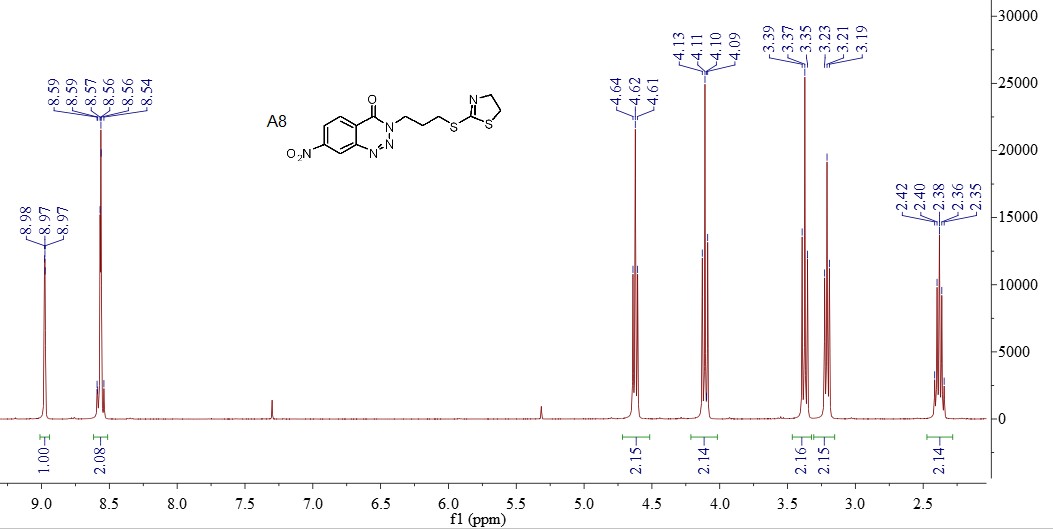


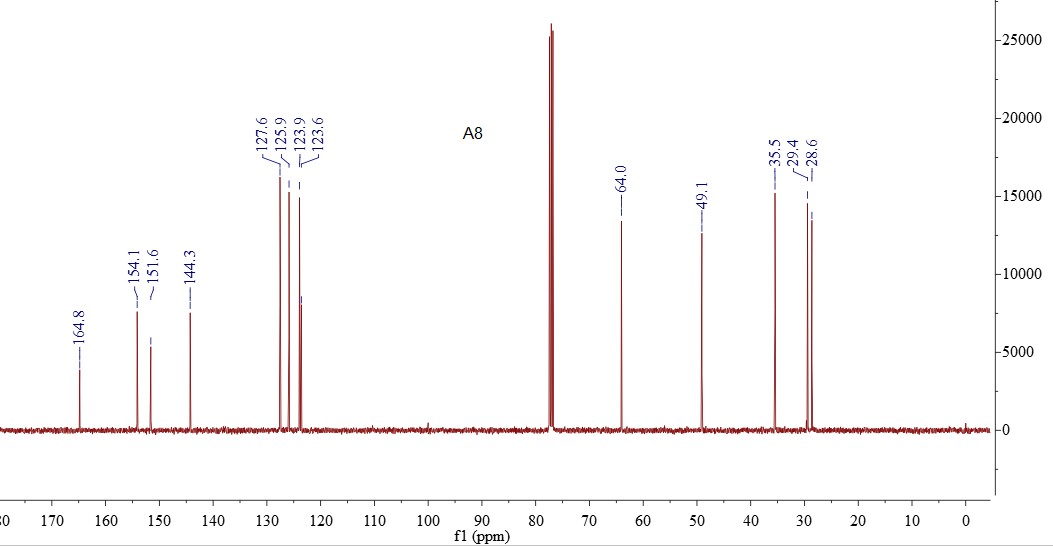


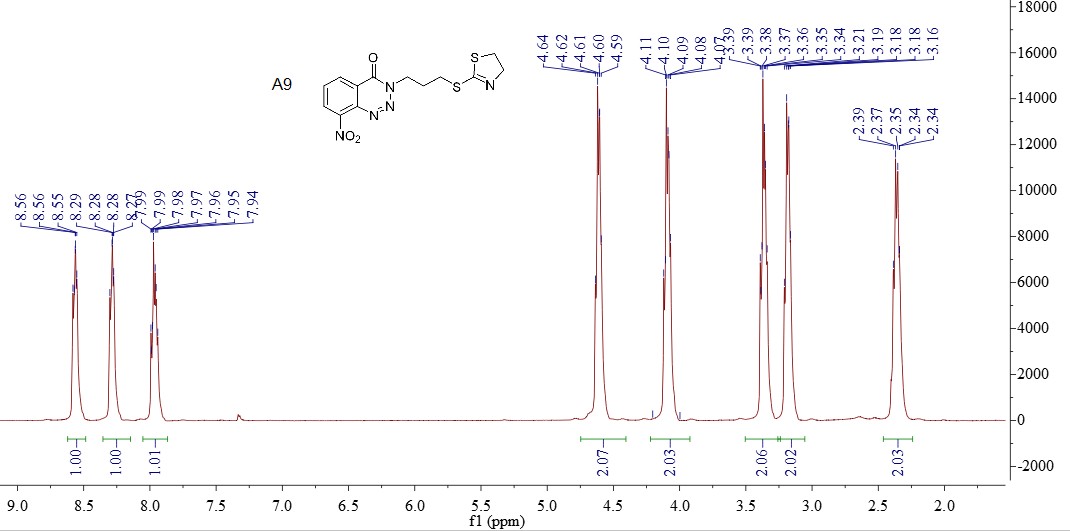


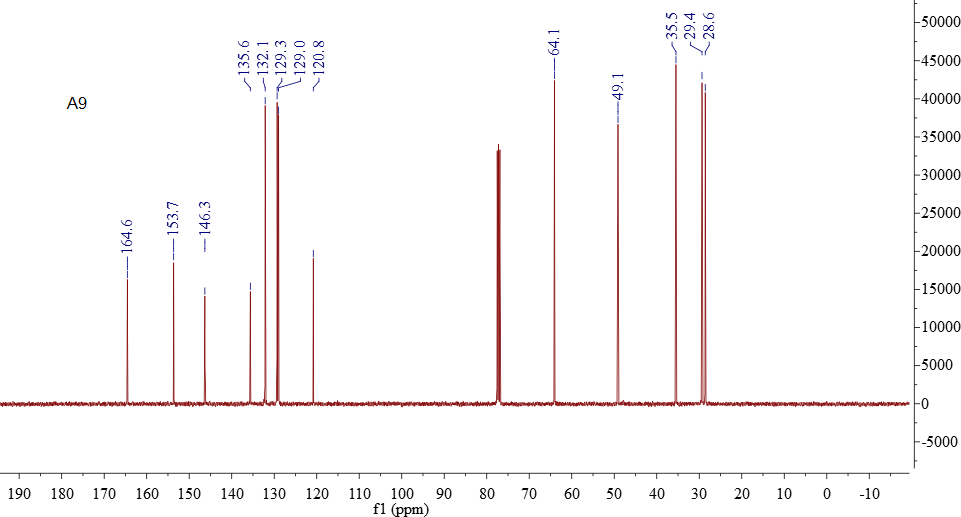


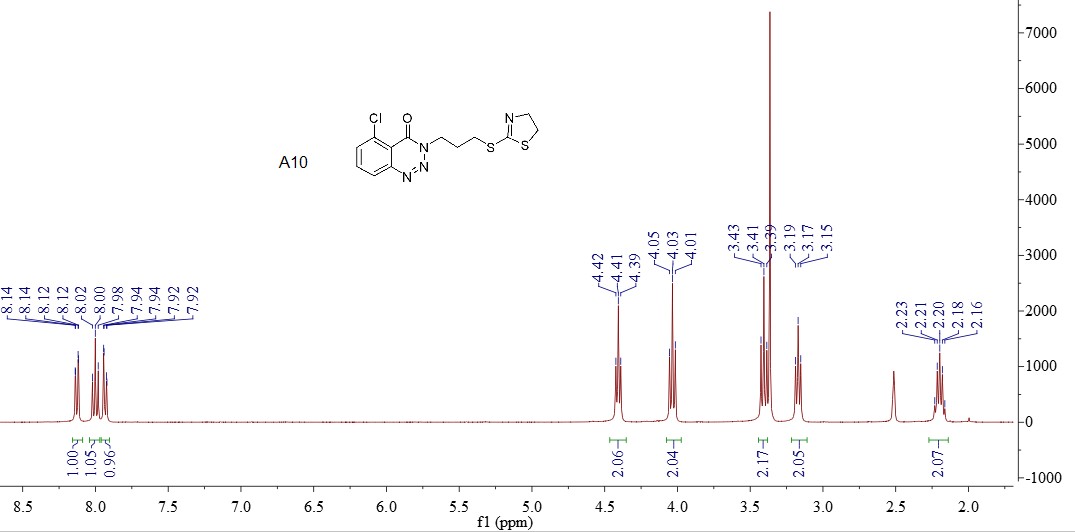


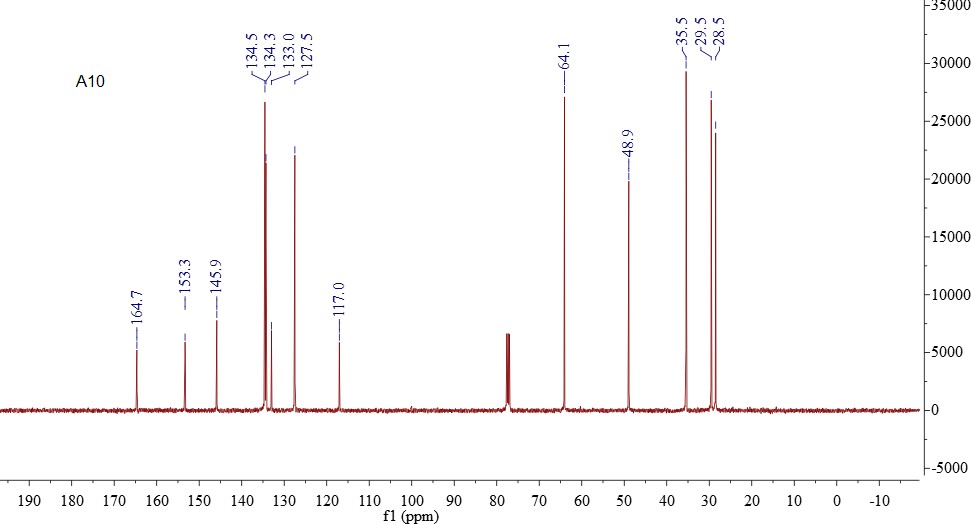


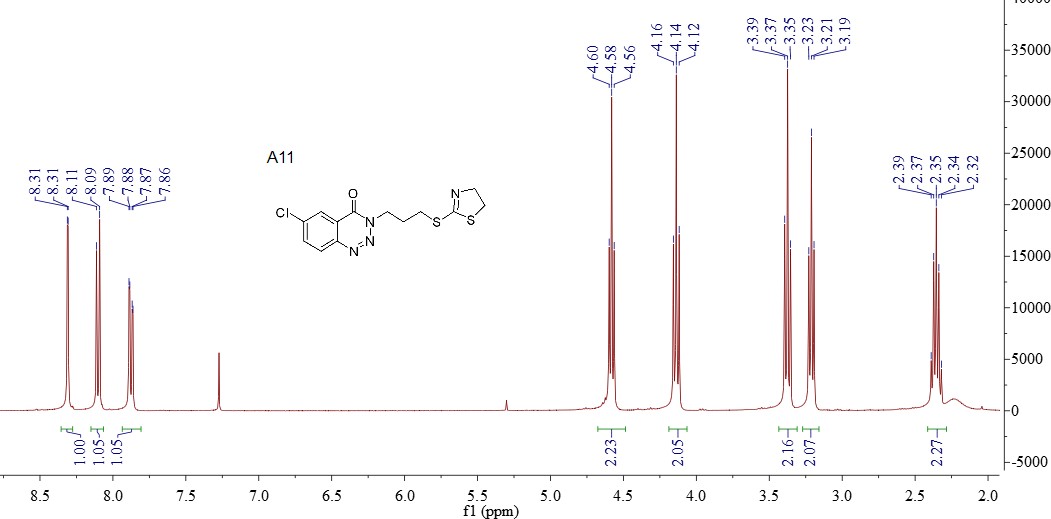


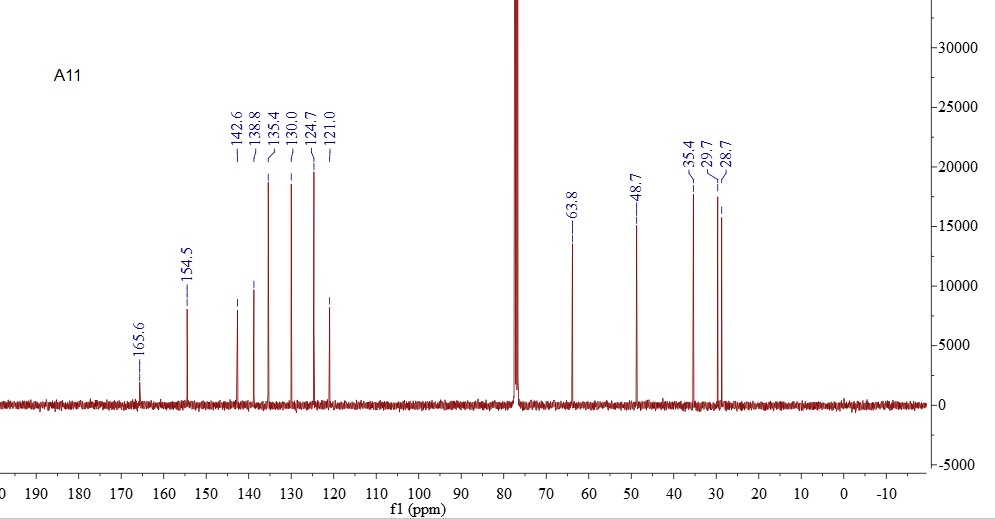


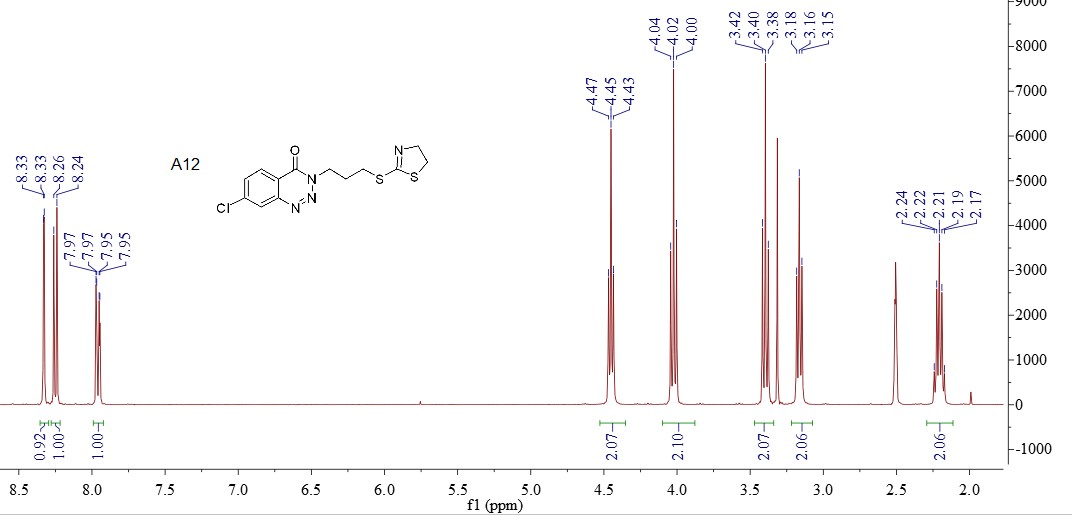


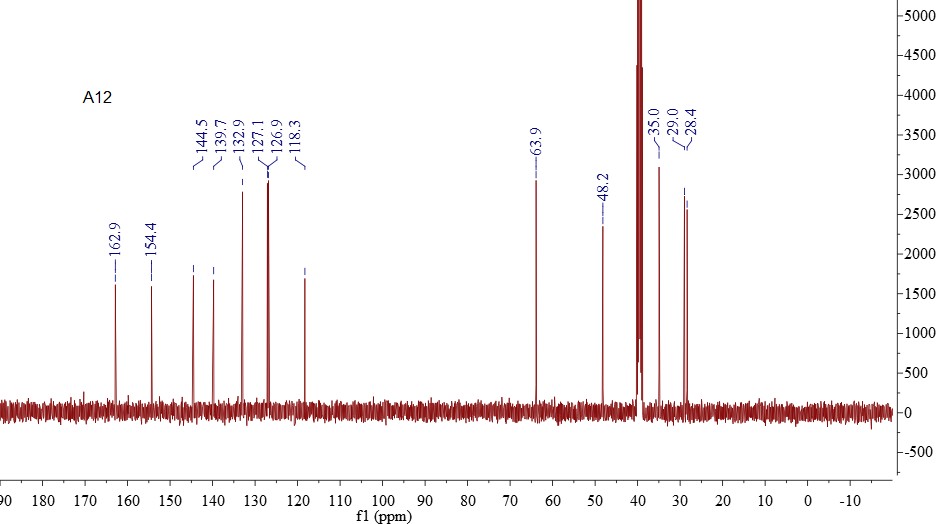


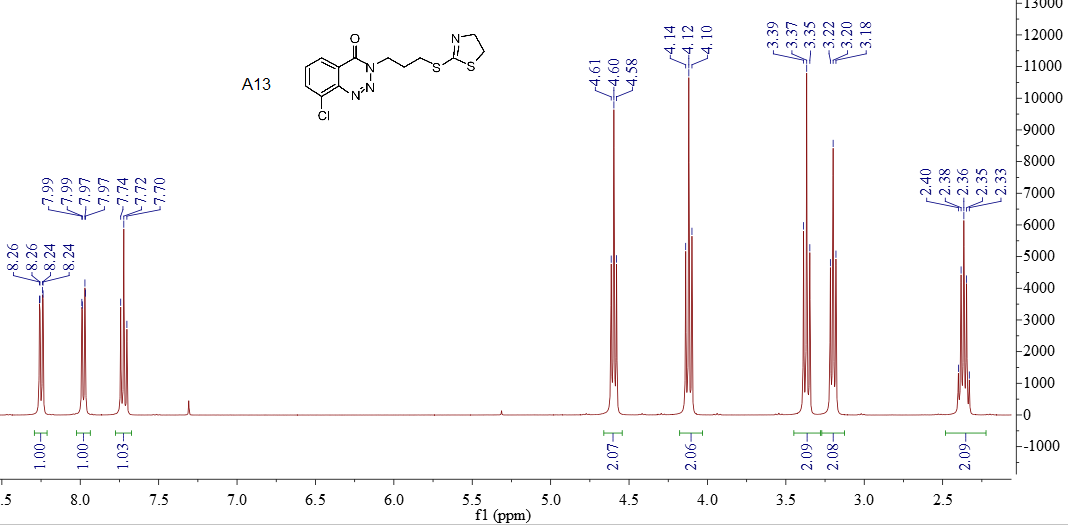


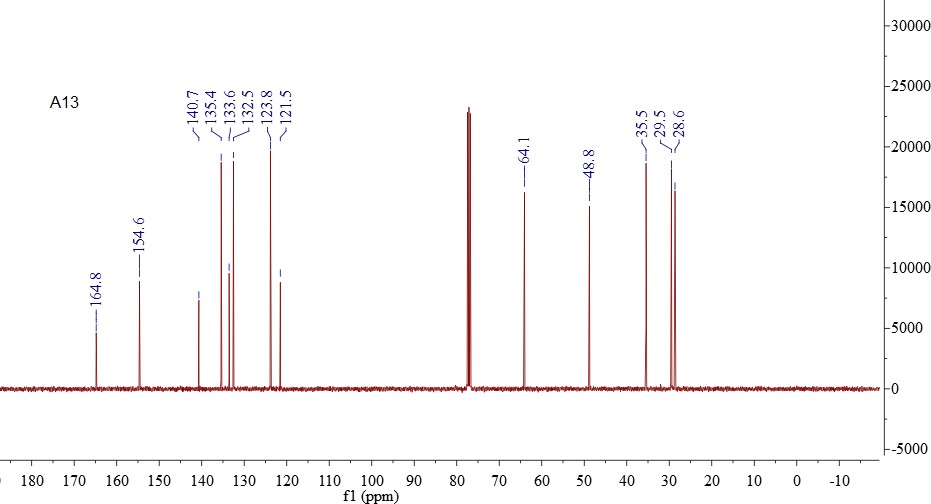


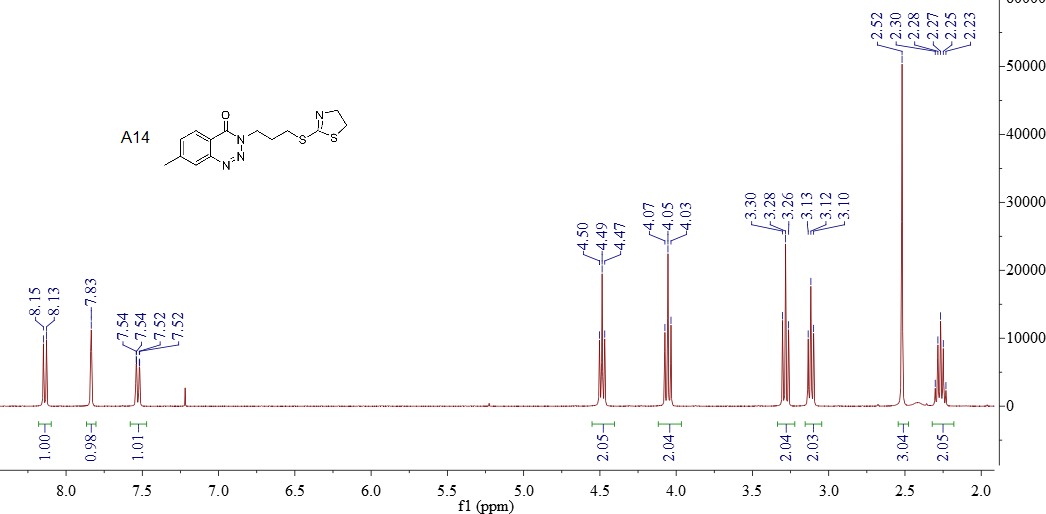


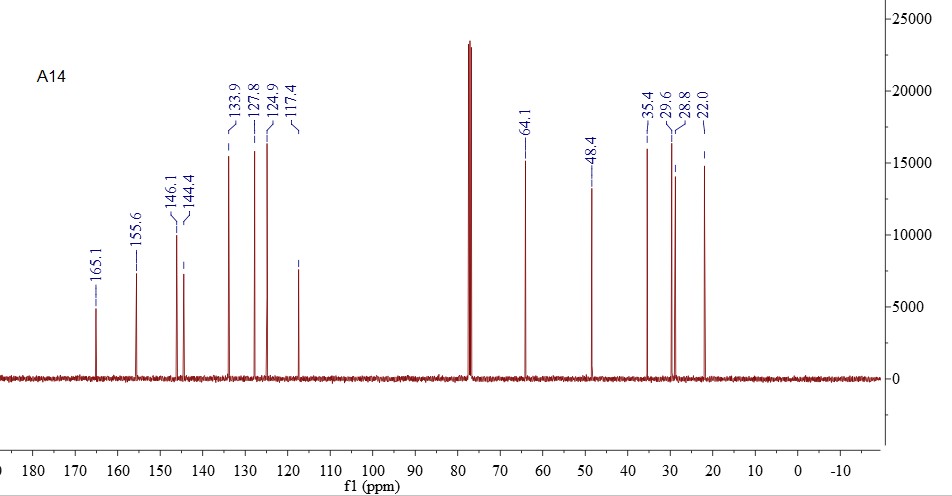


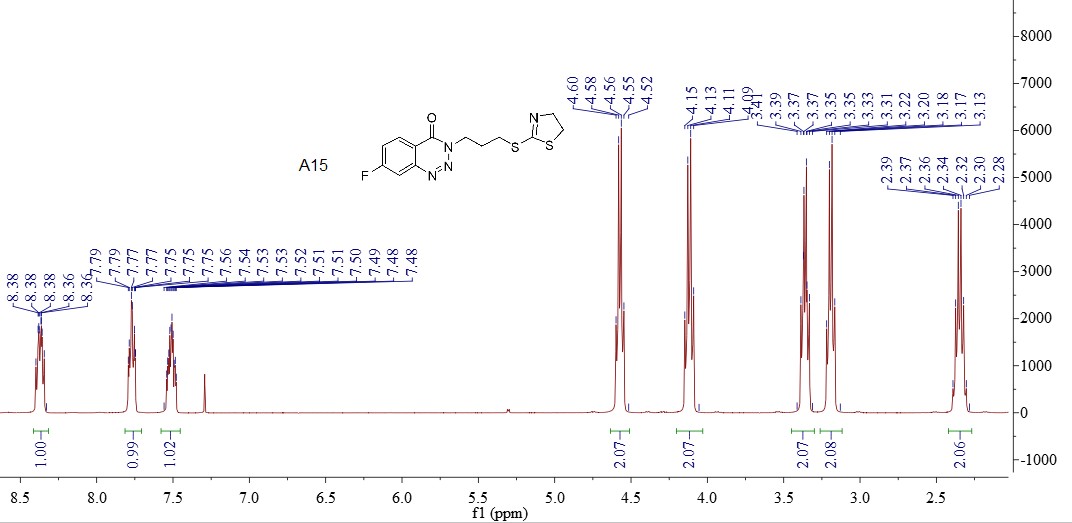


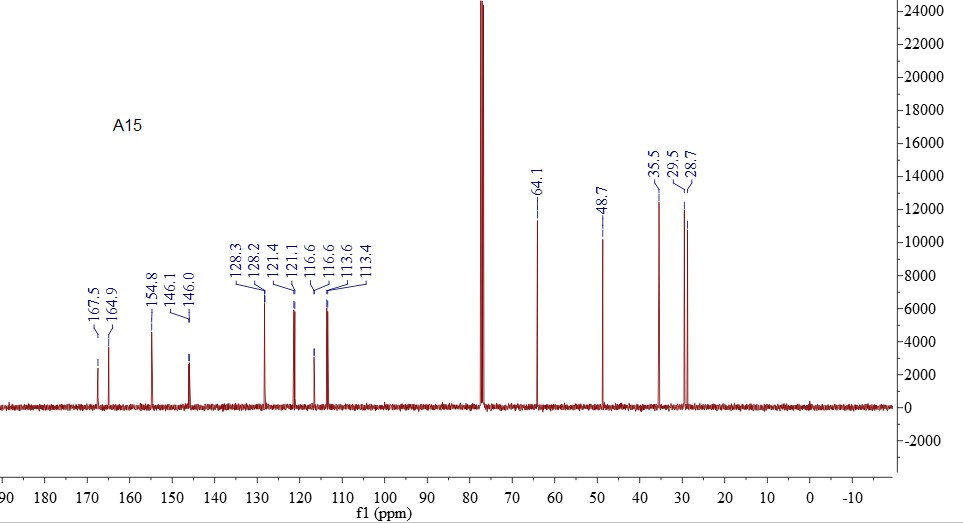


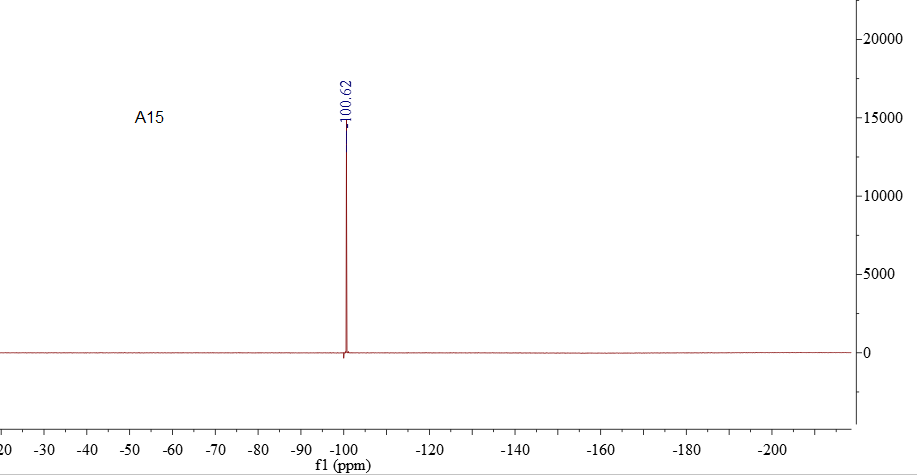


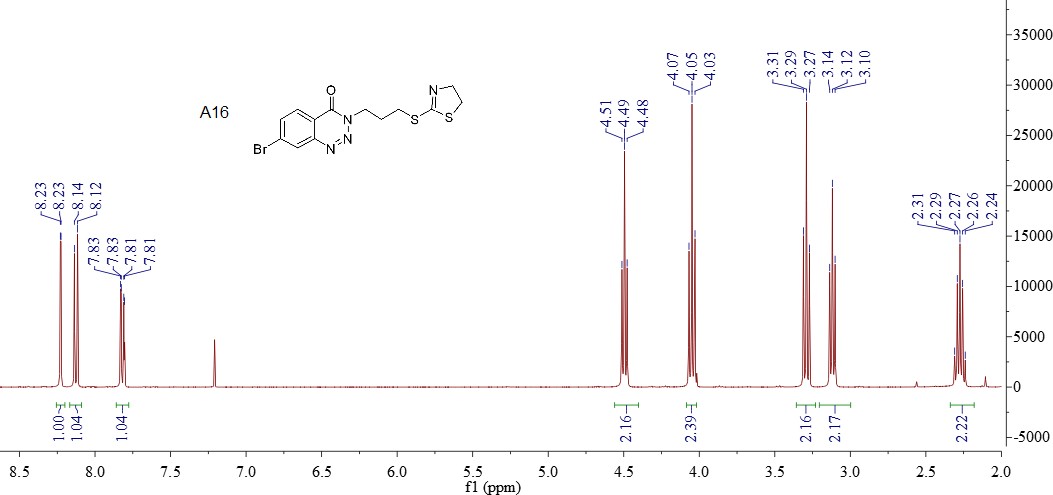


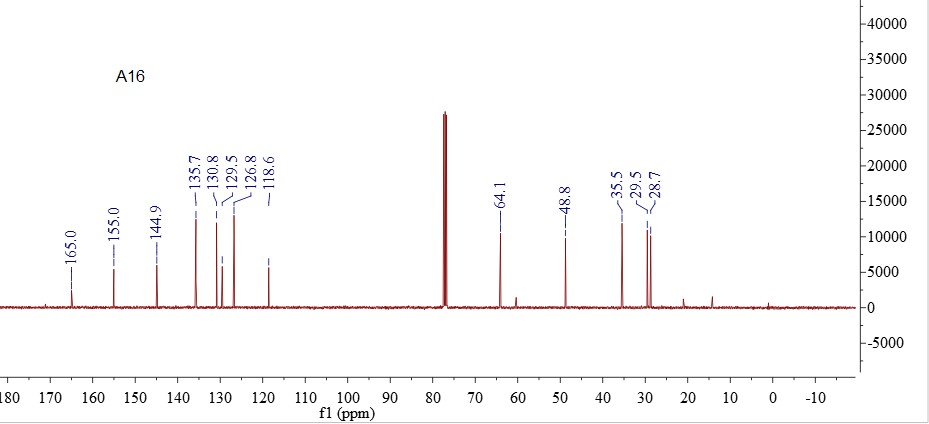


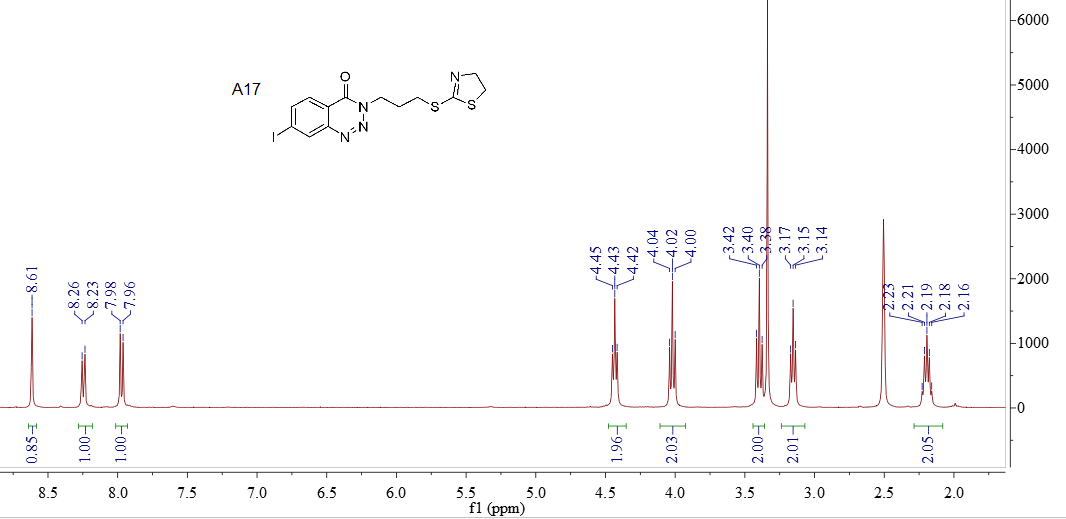


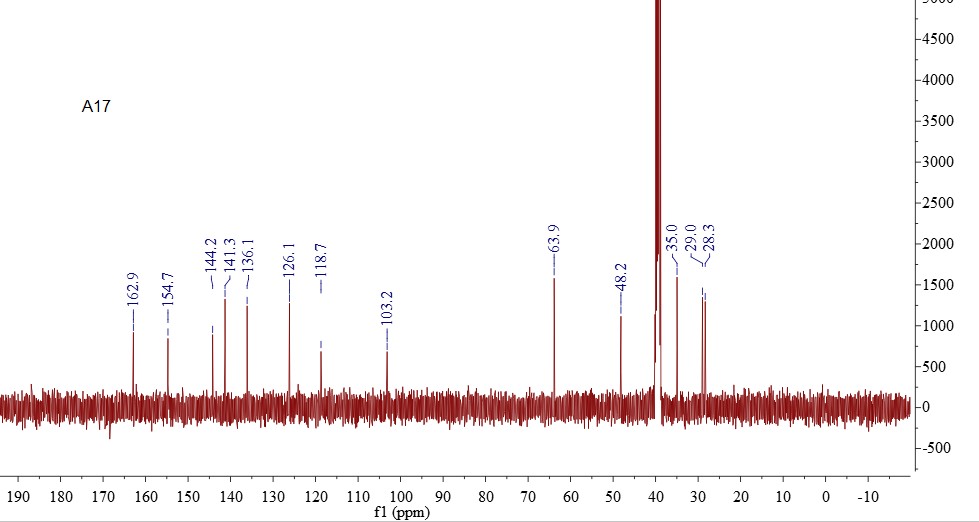


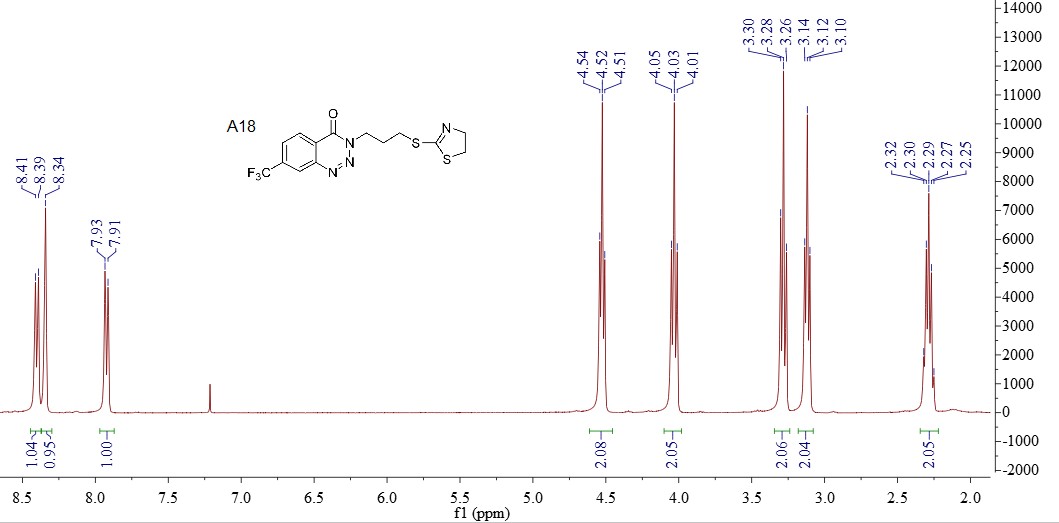


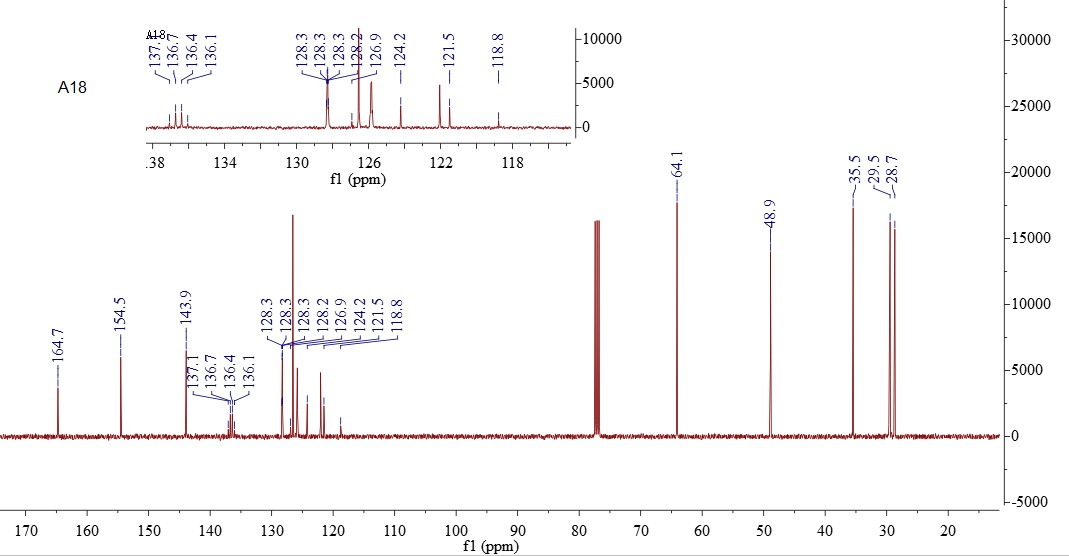


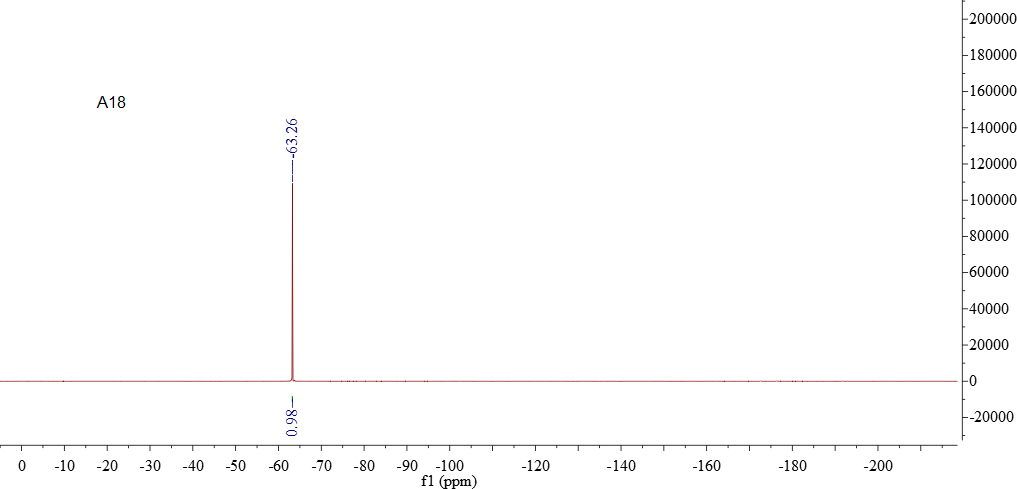


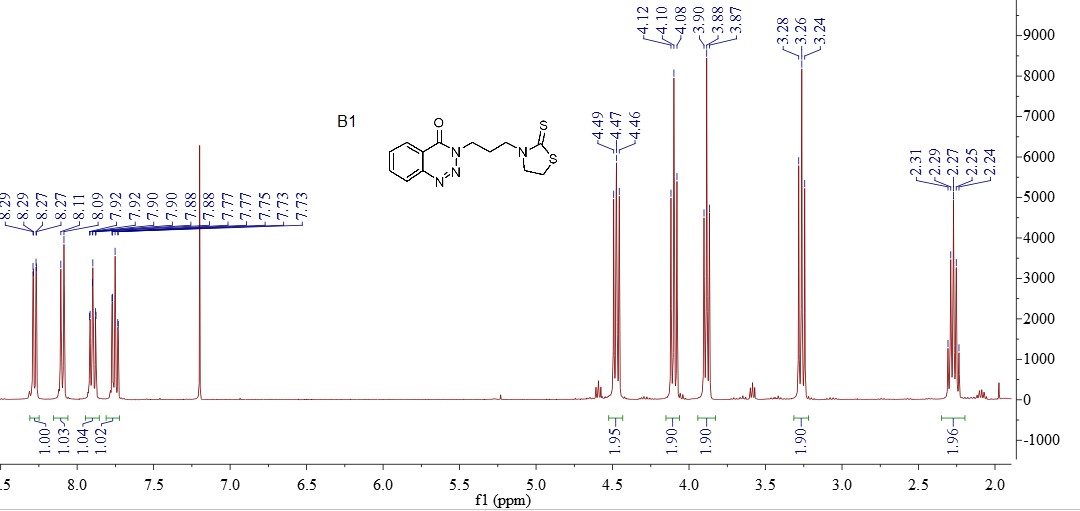


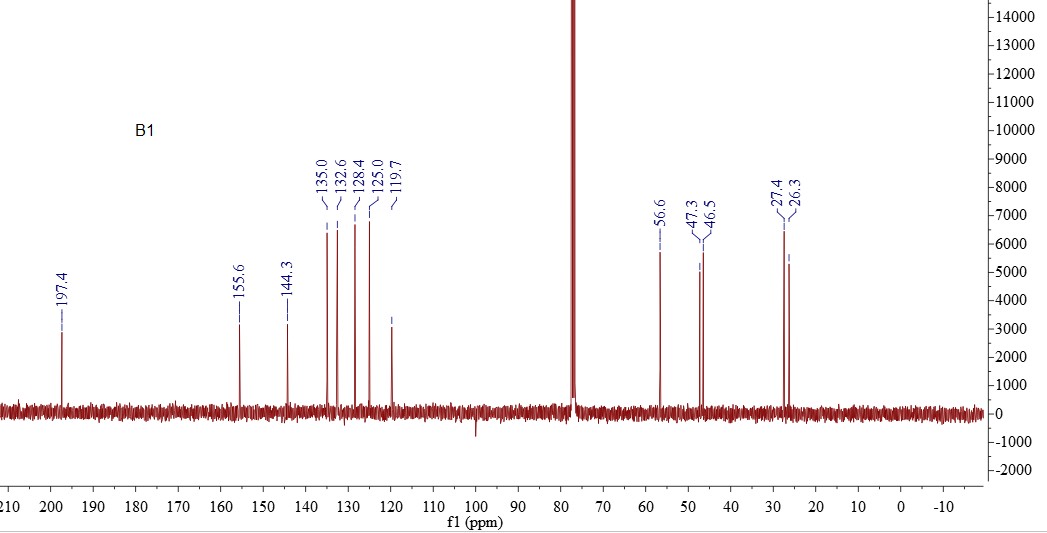


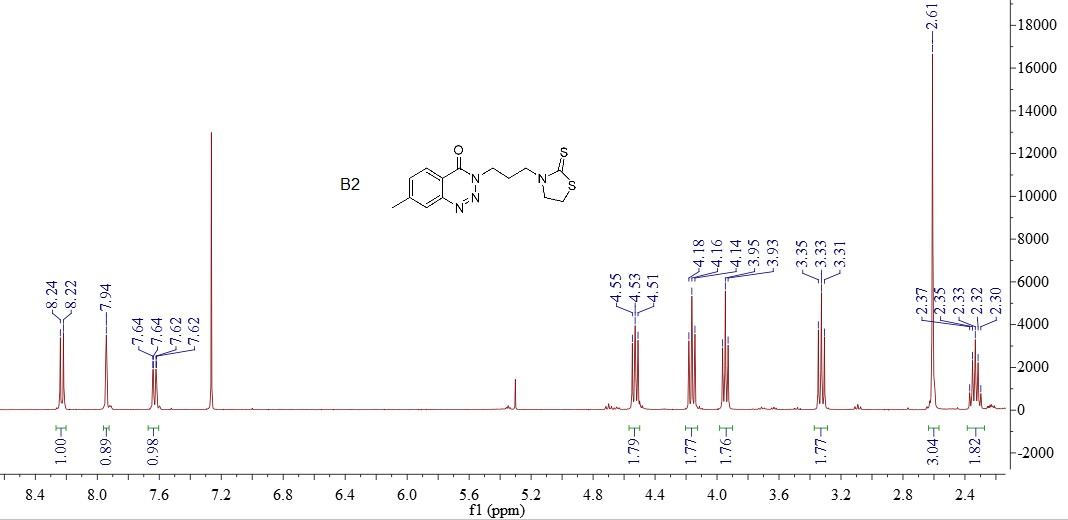


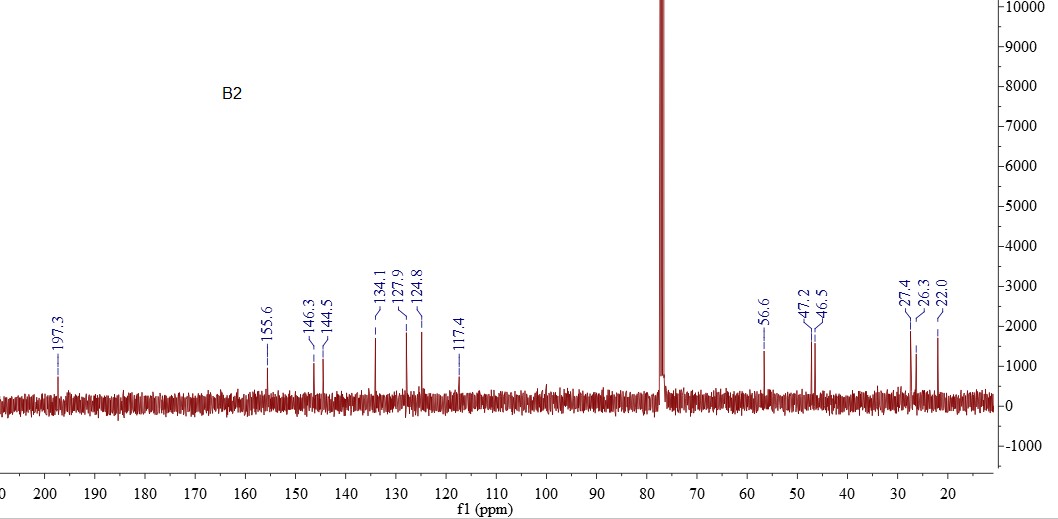


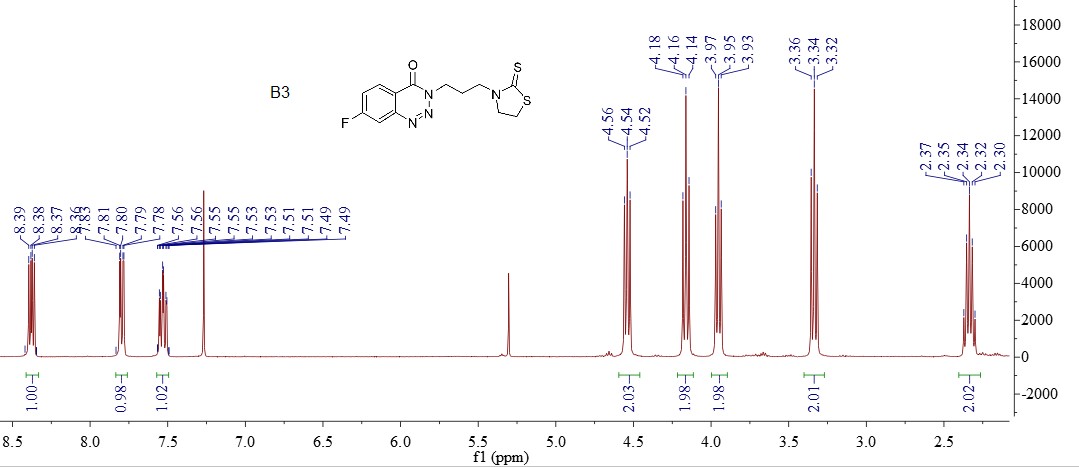


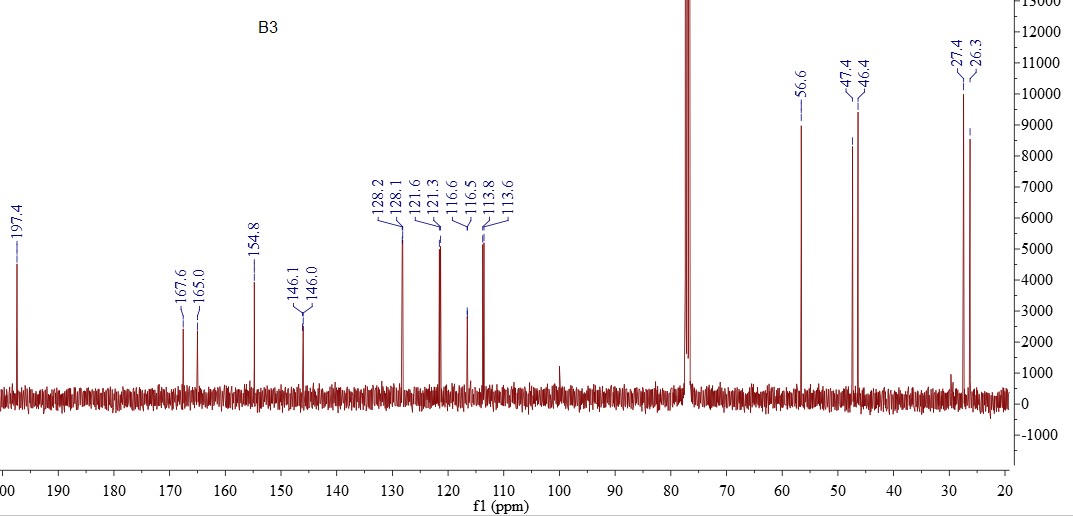


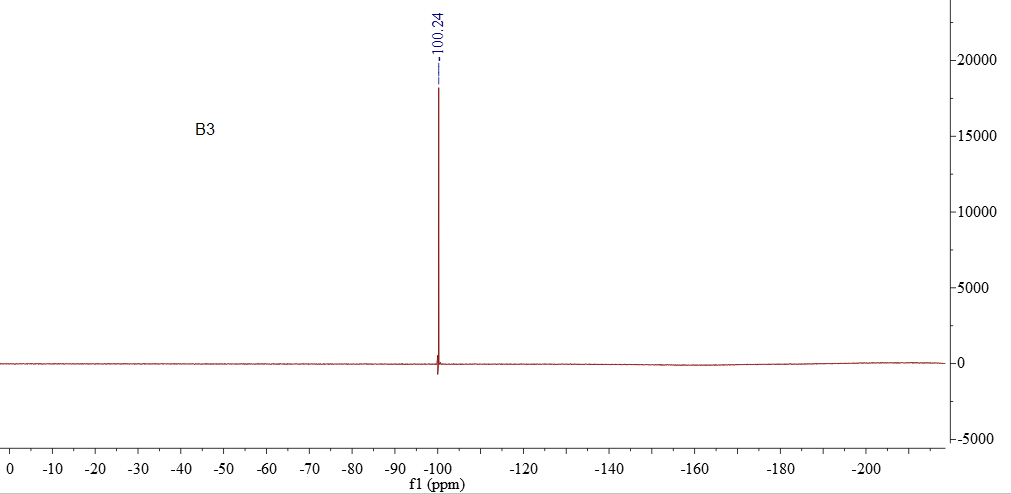


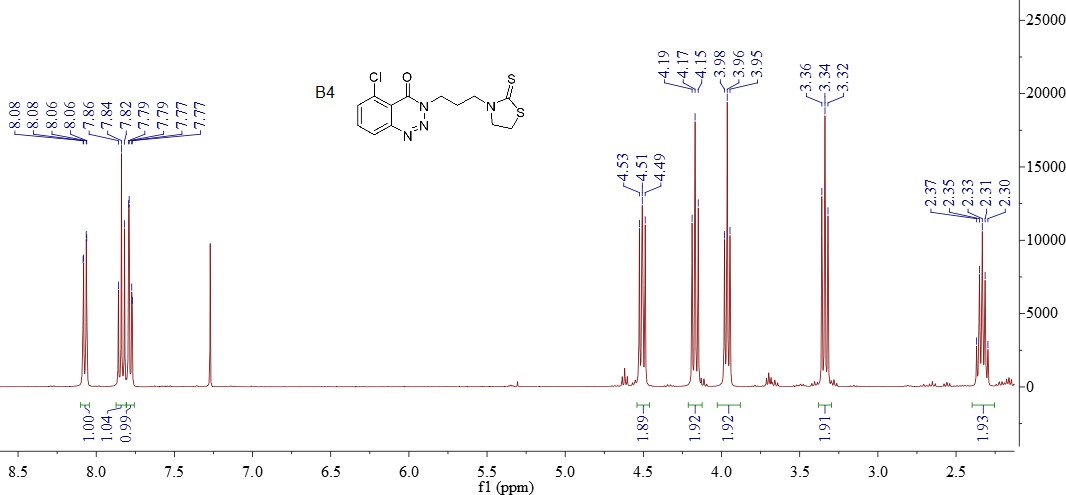


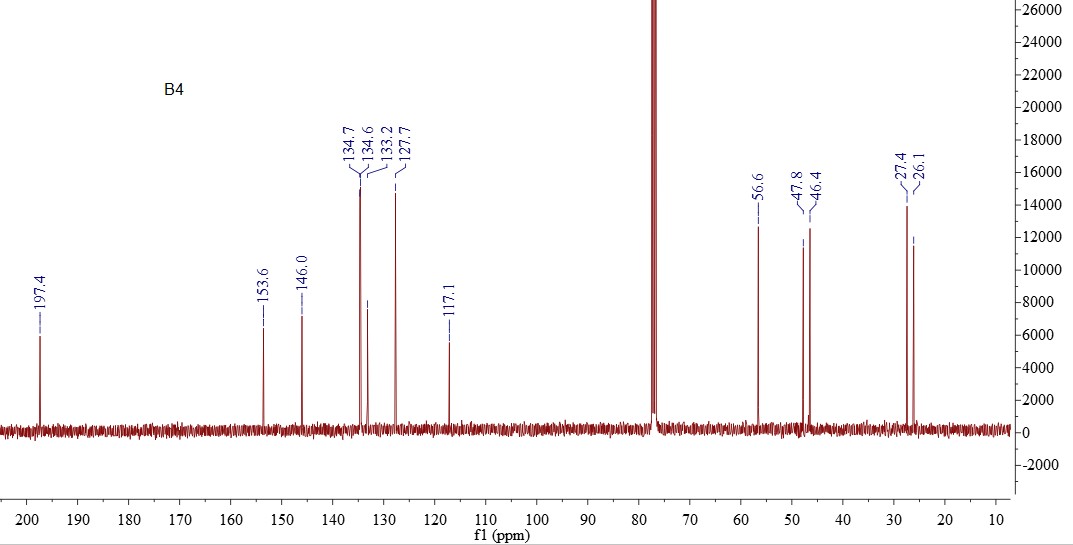


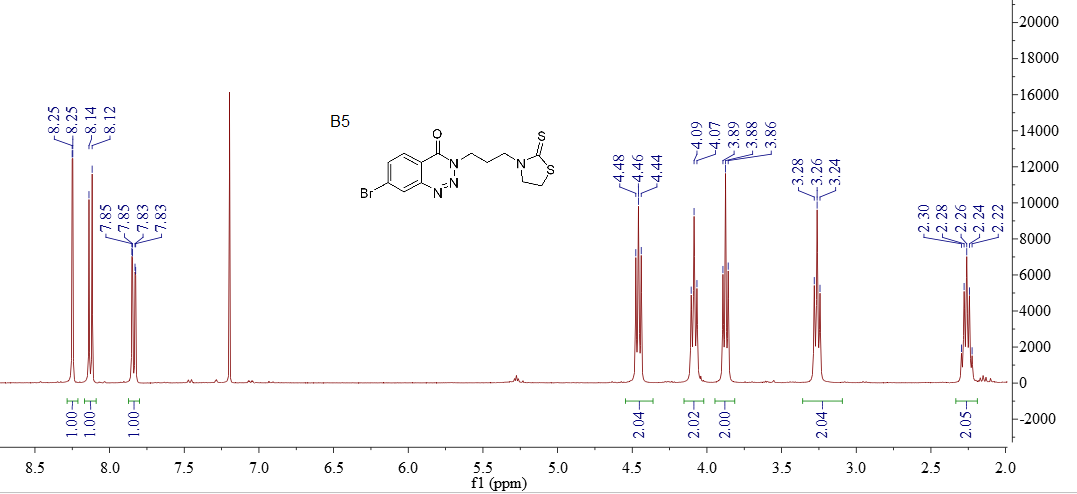


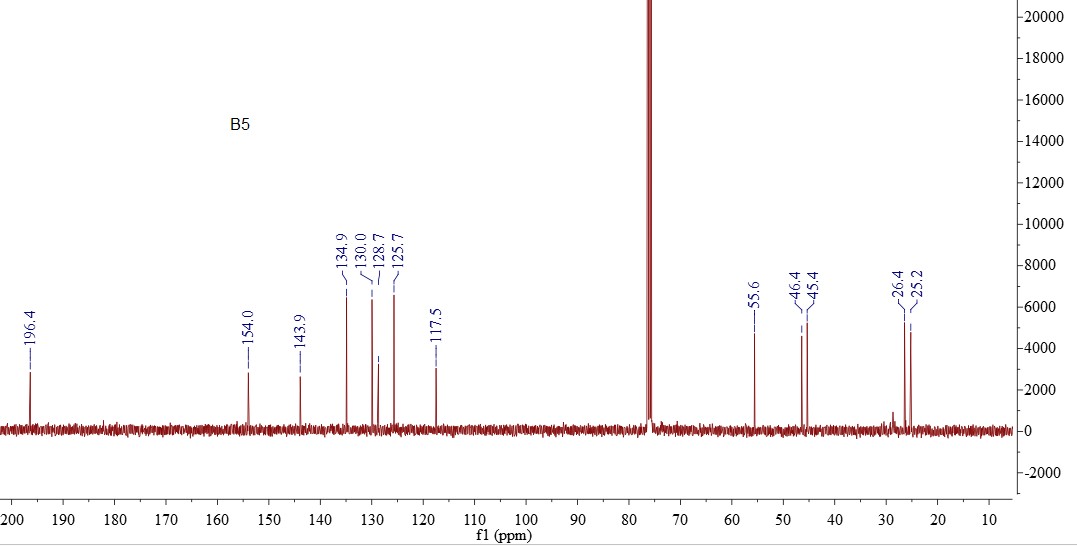


1. ***1H NMR clearly assignment of A3 and 13C NMR clearly assignment of A1***


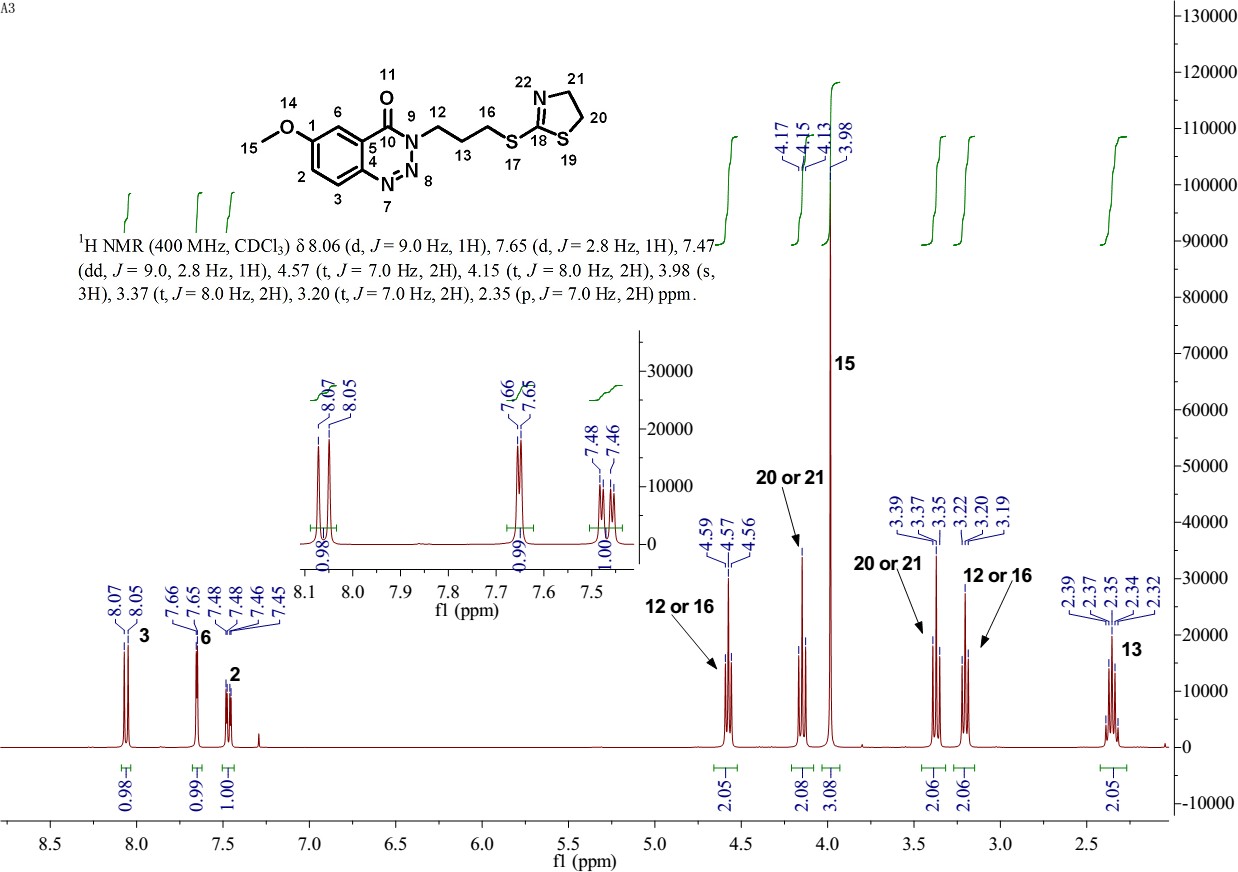


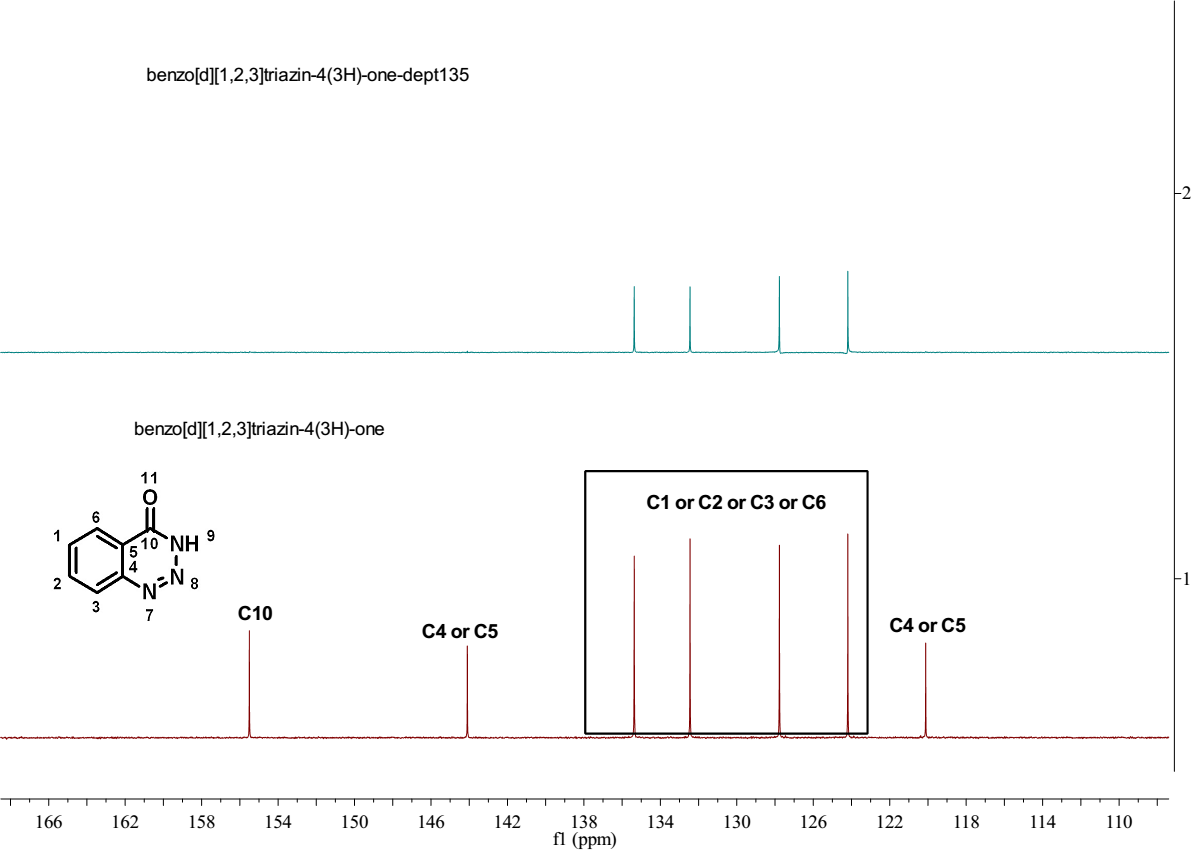


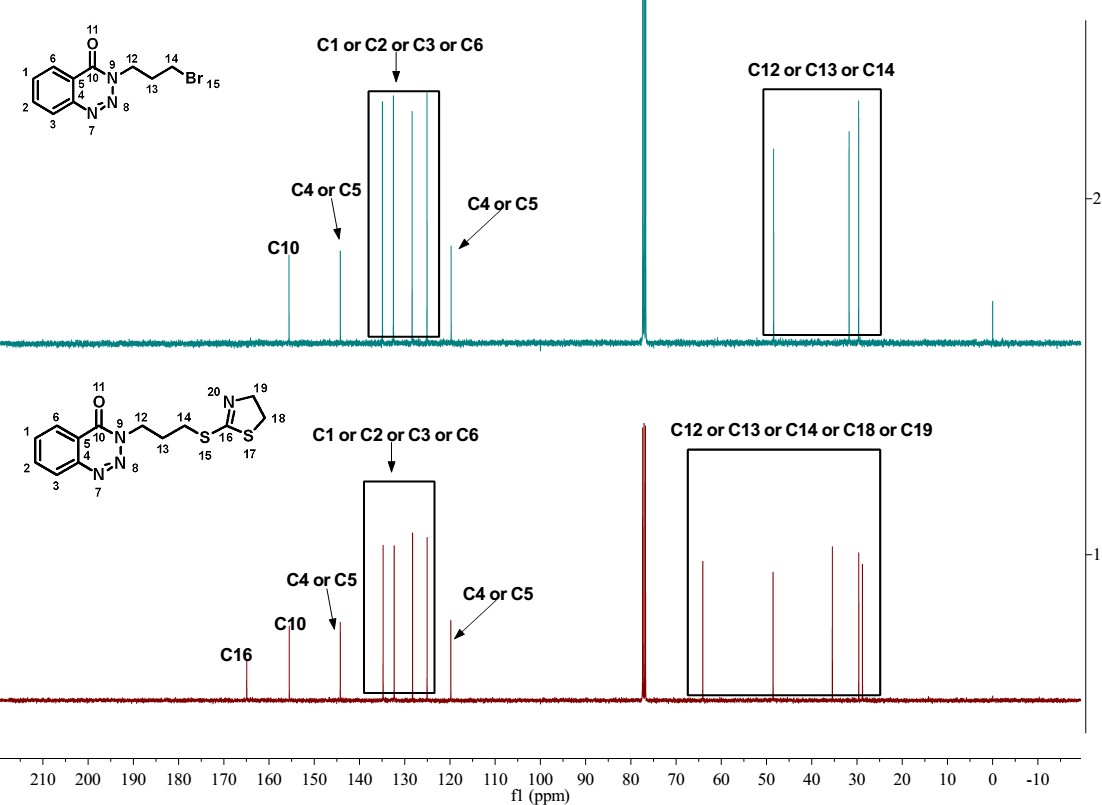


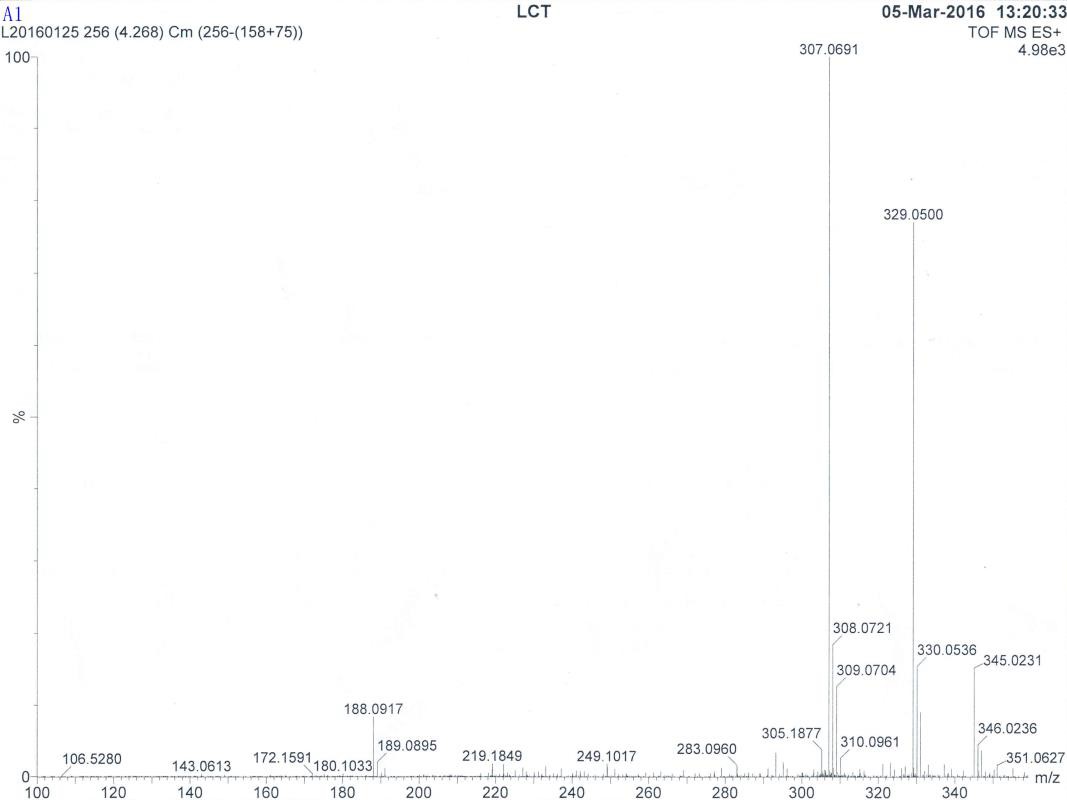


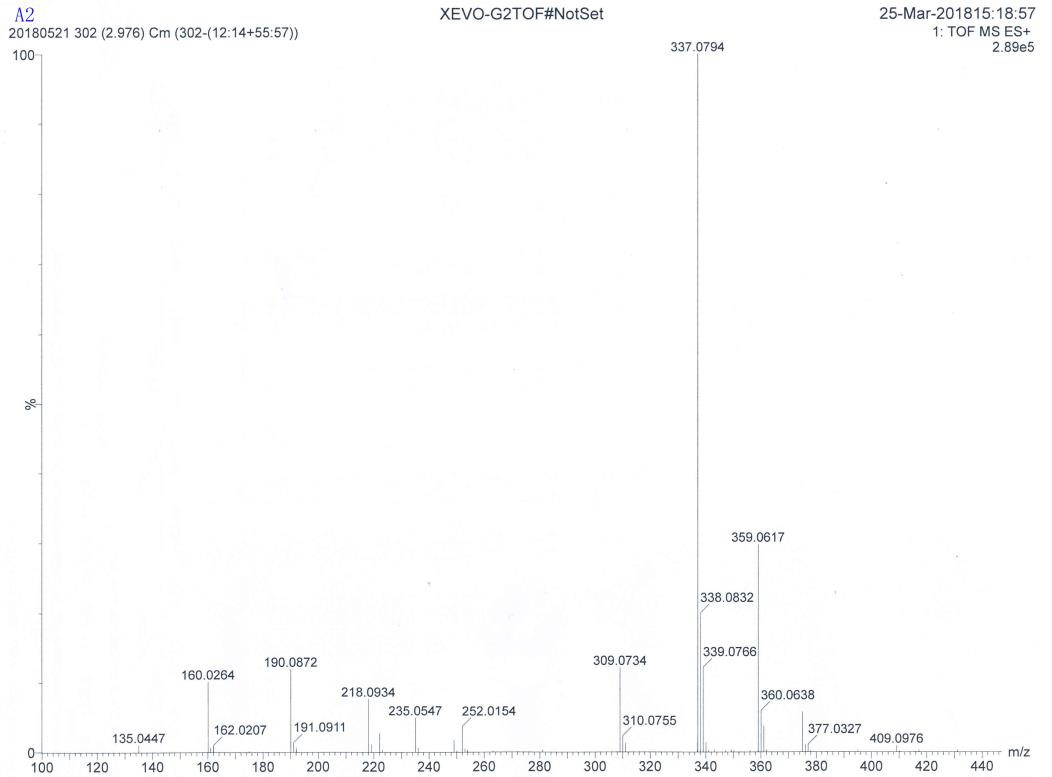


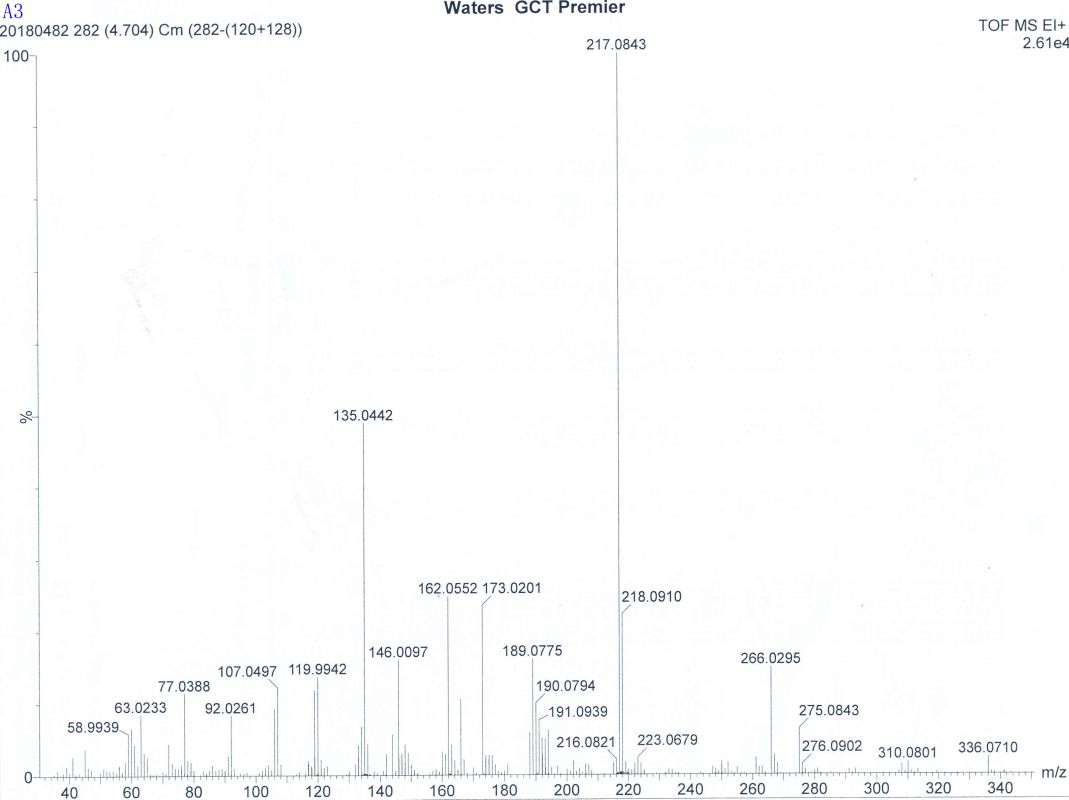


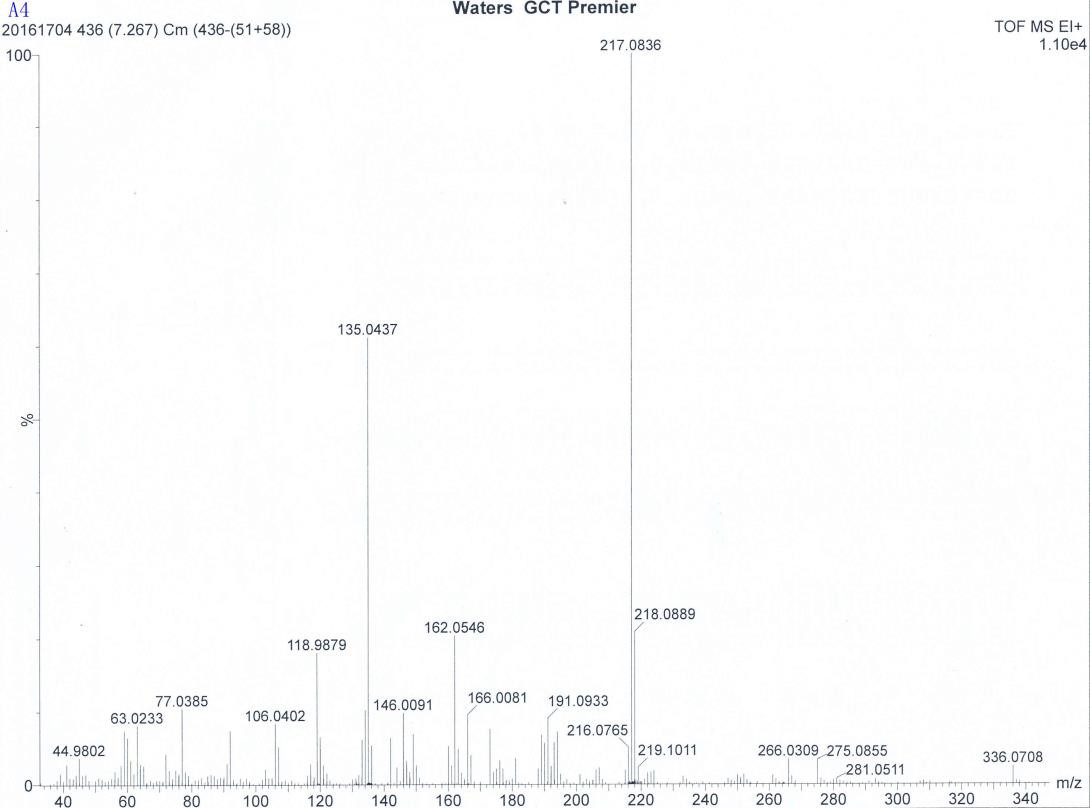


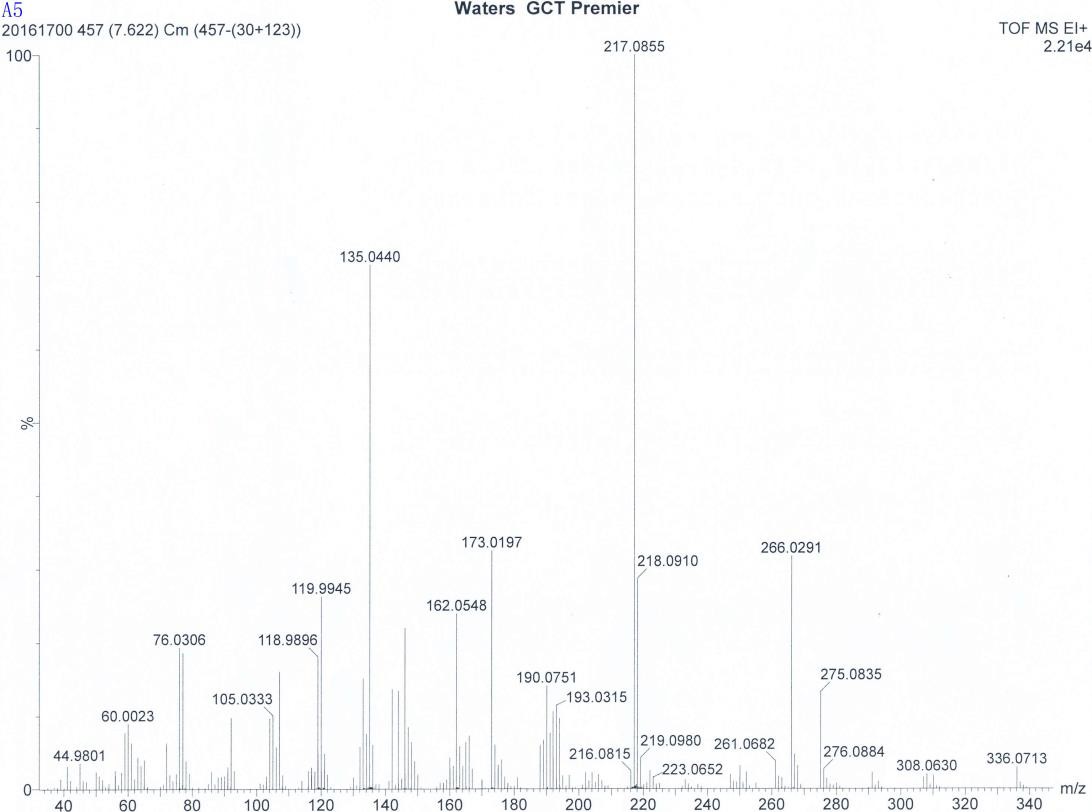


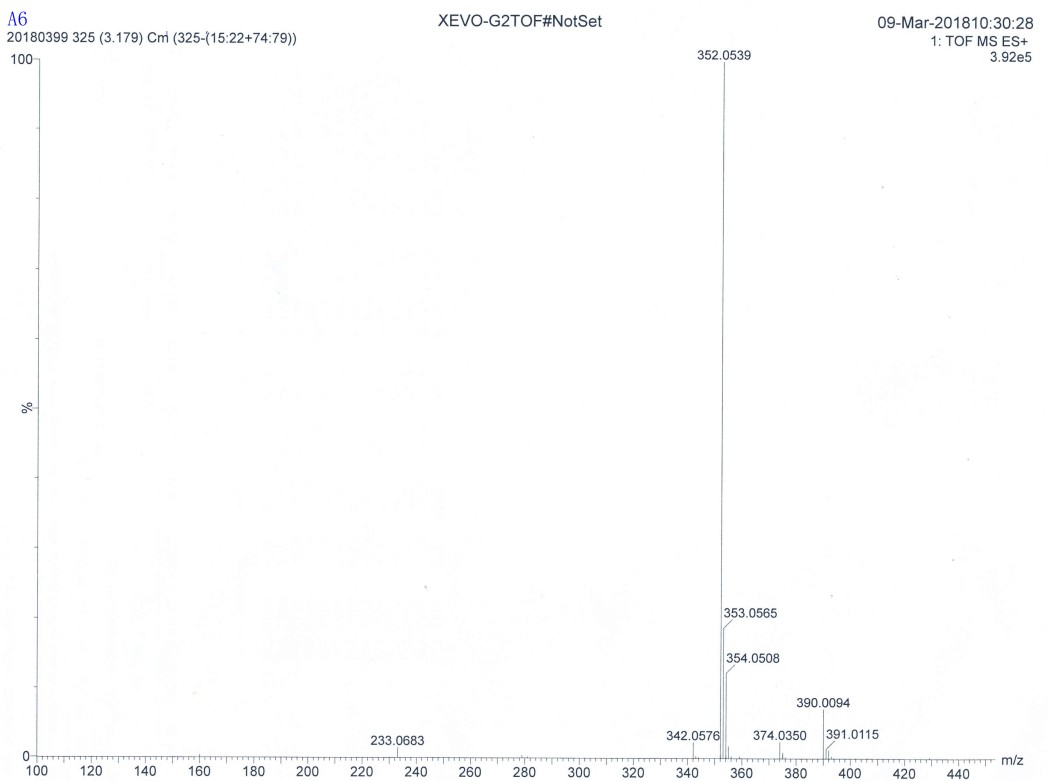


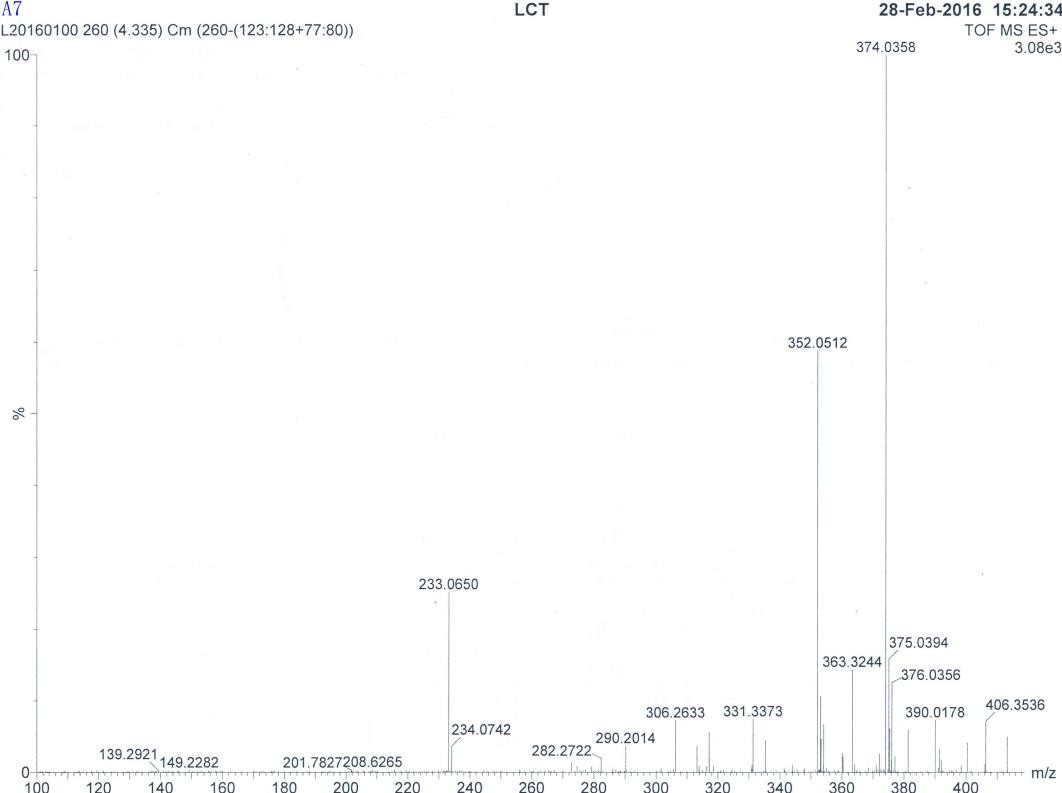


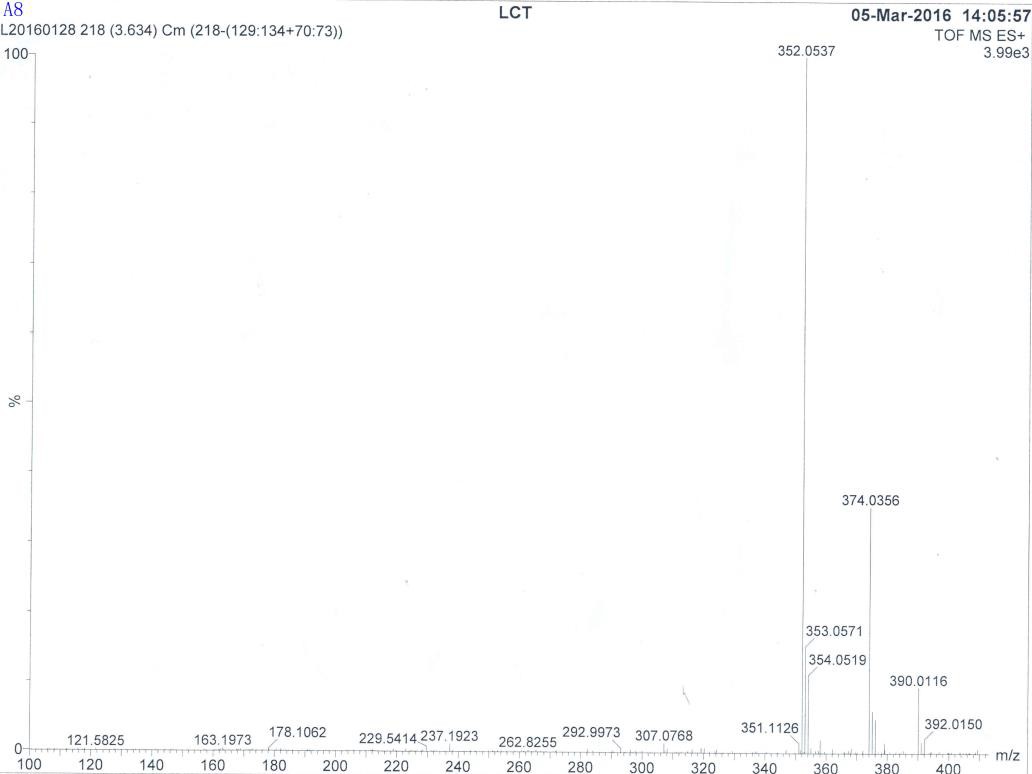


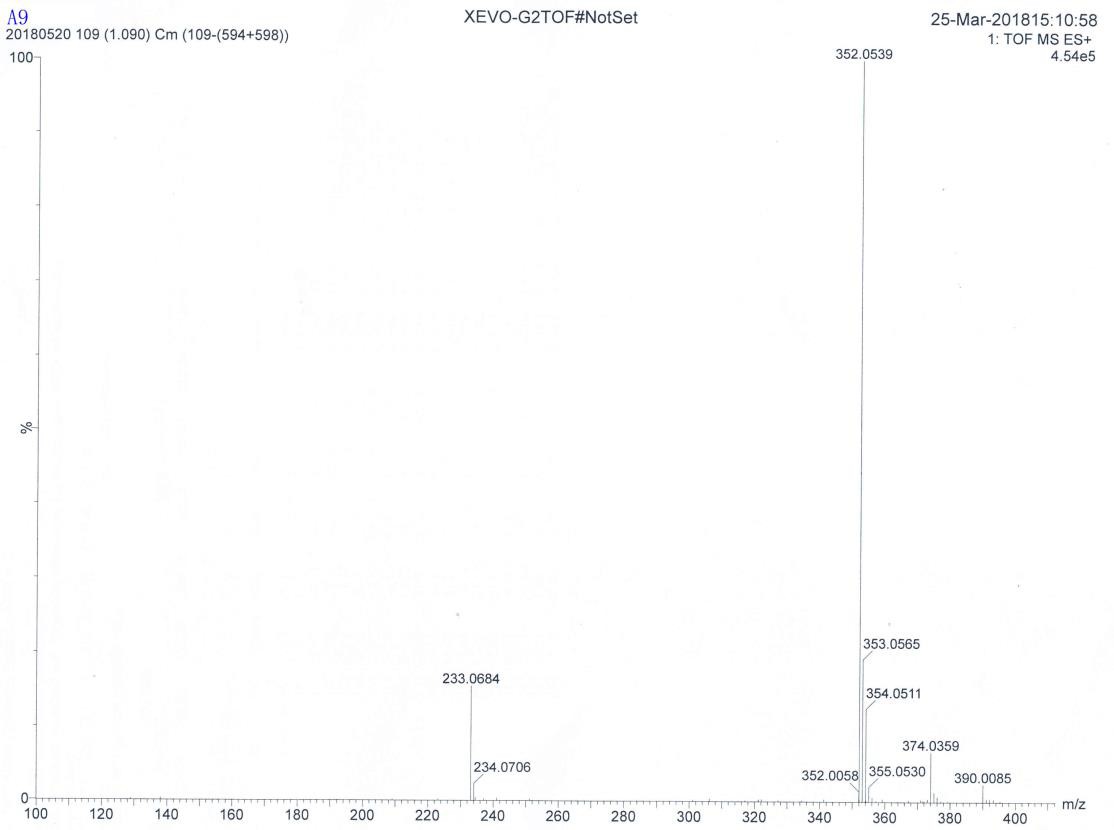


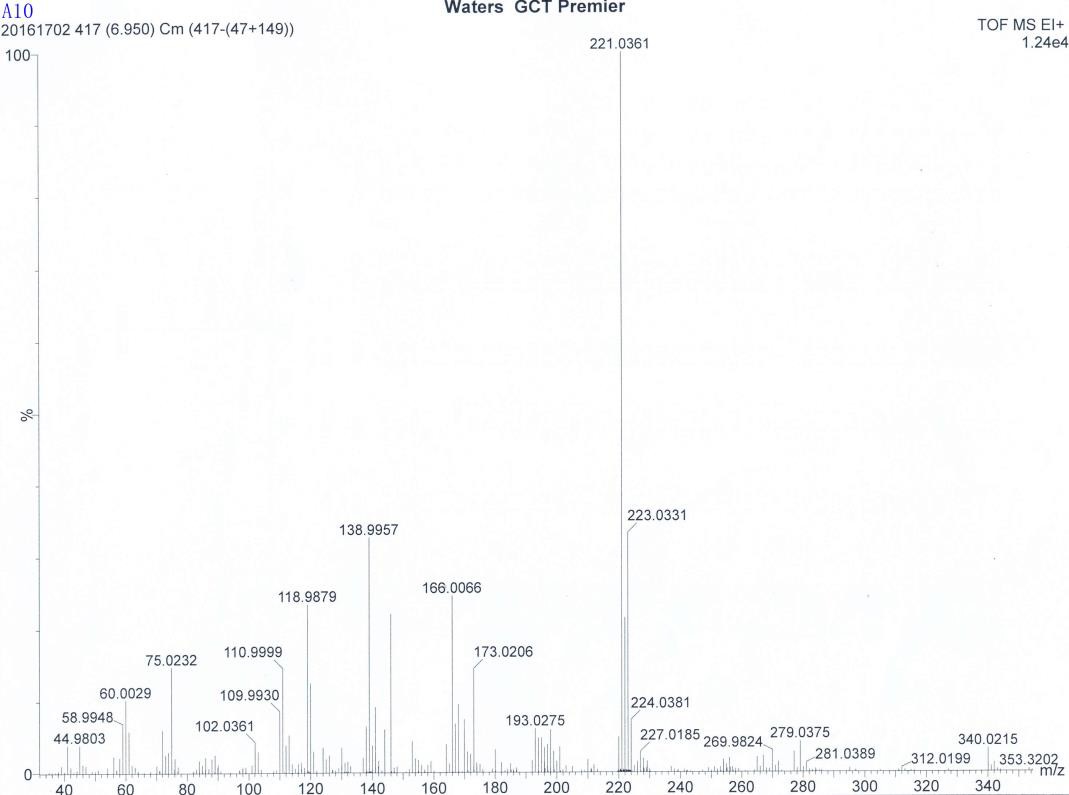


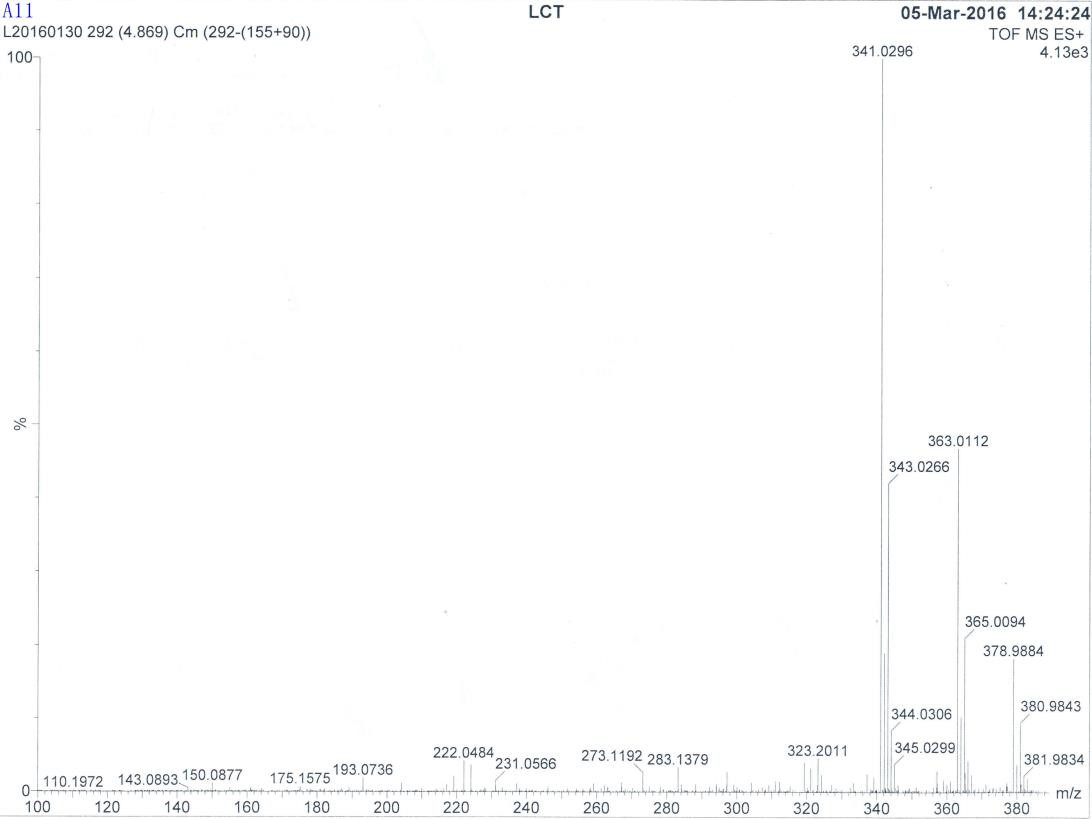


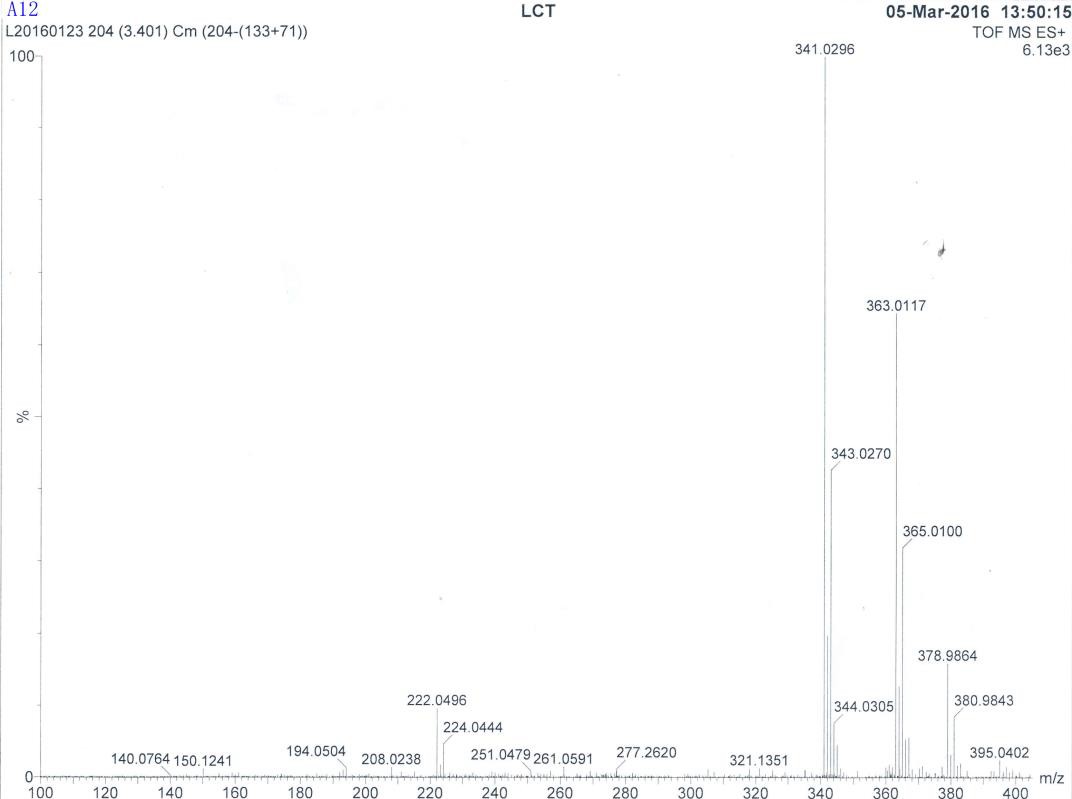


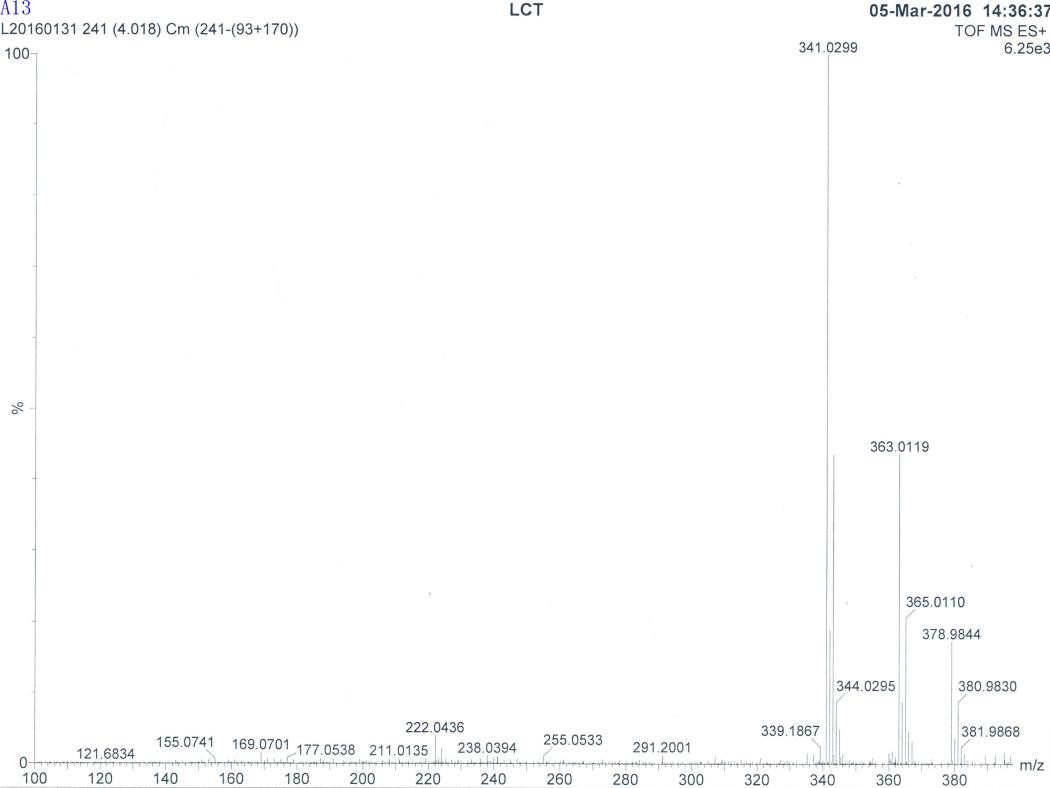


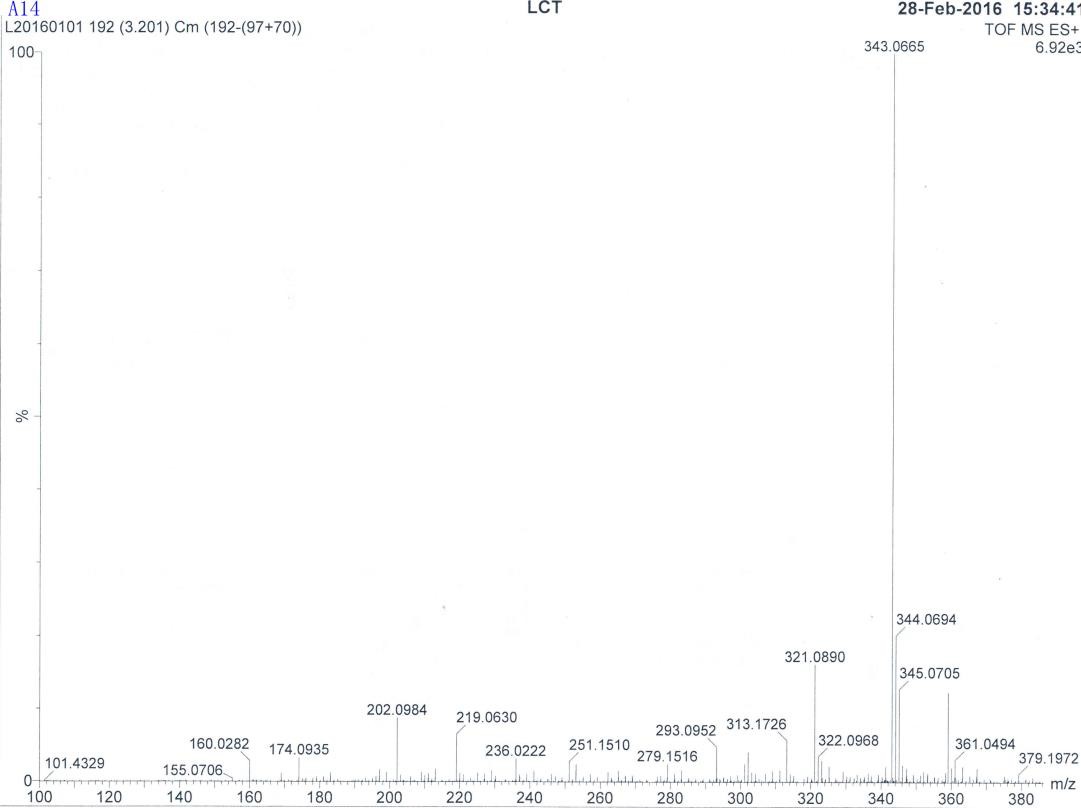


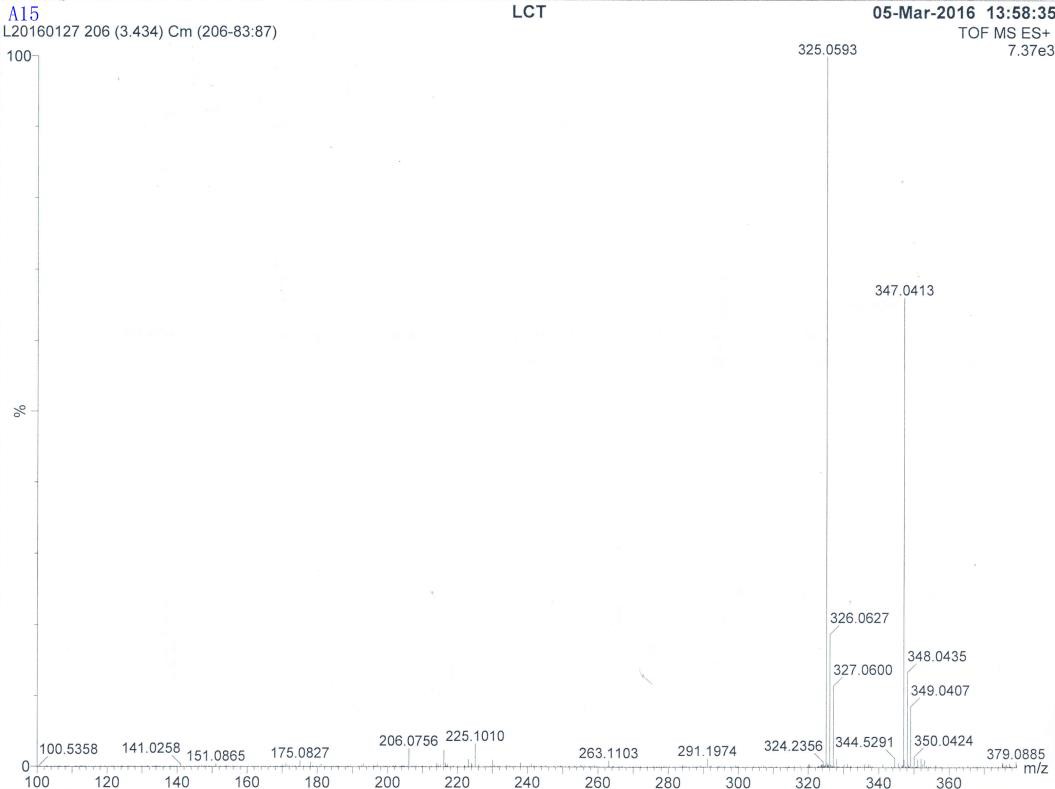


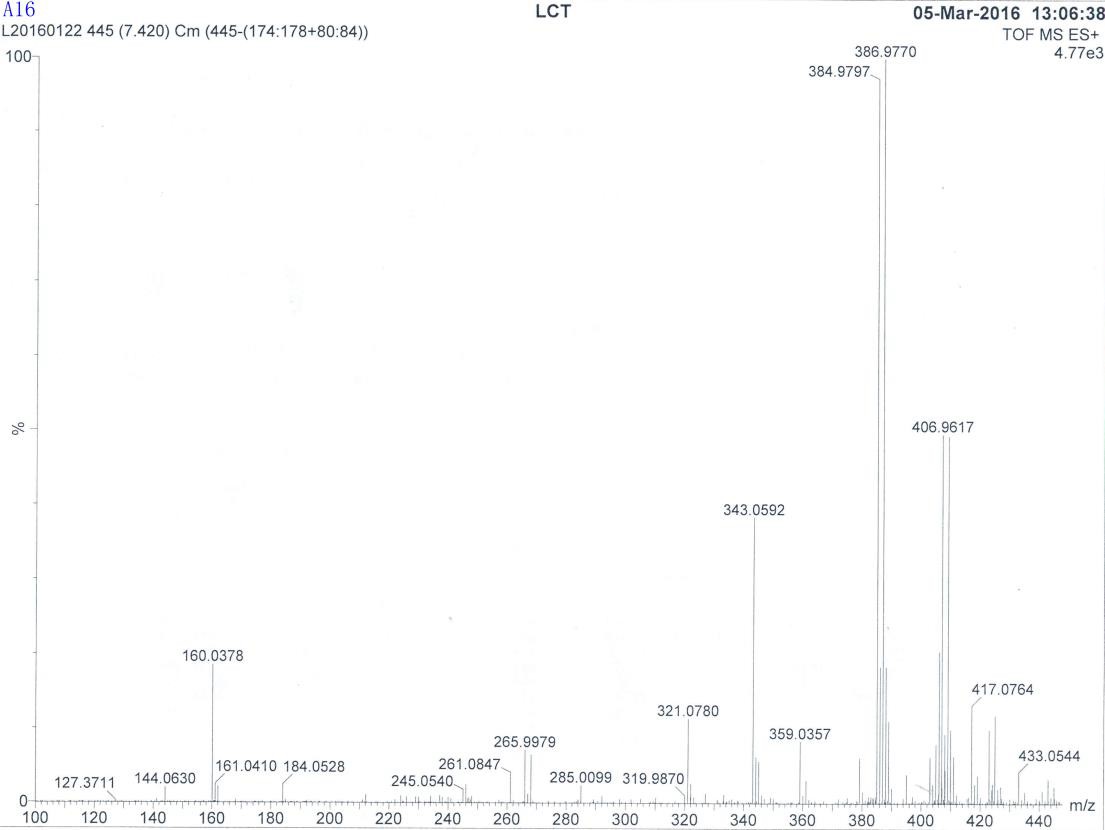


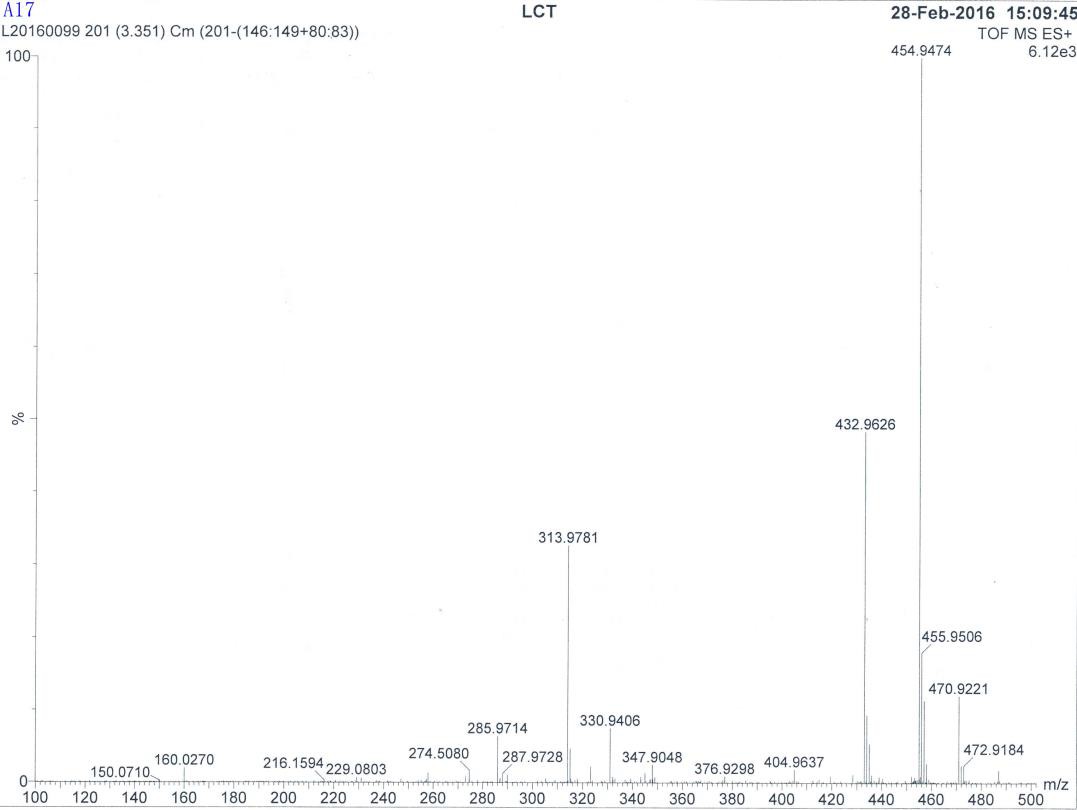


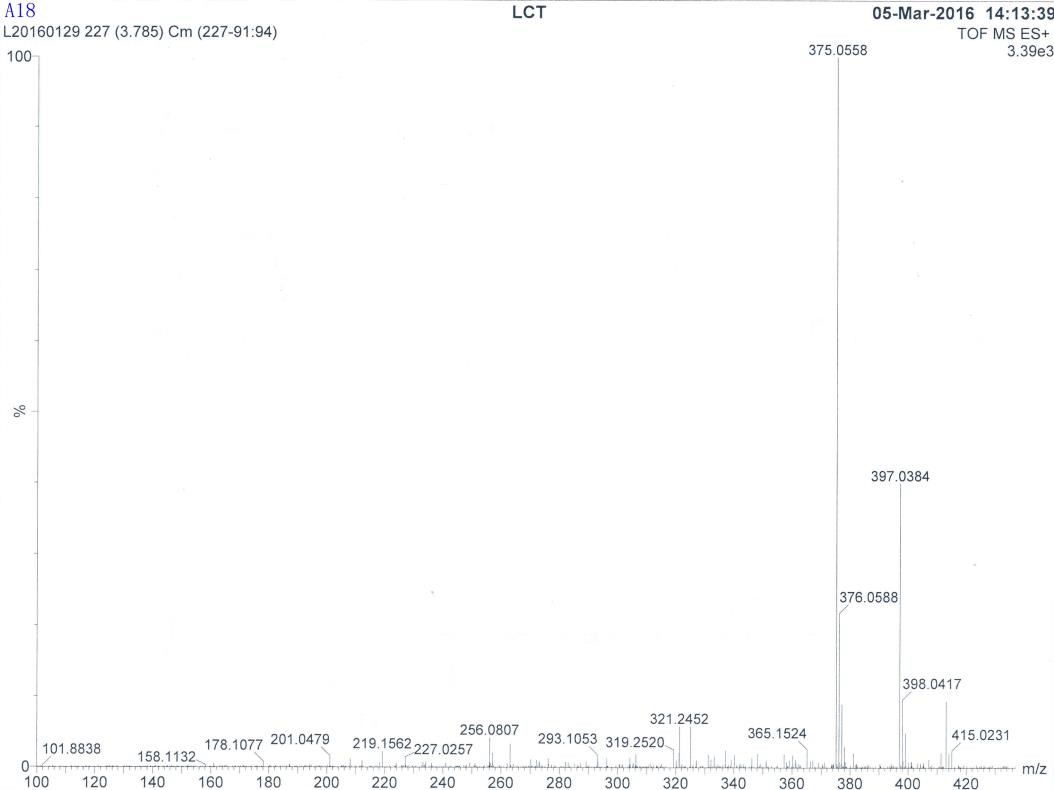


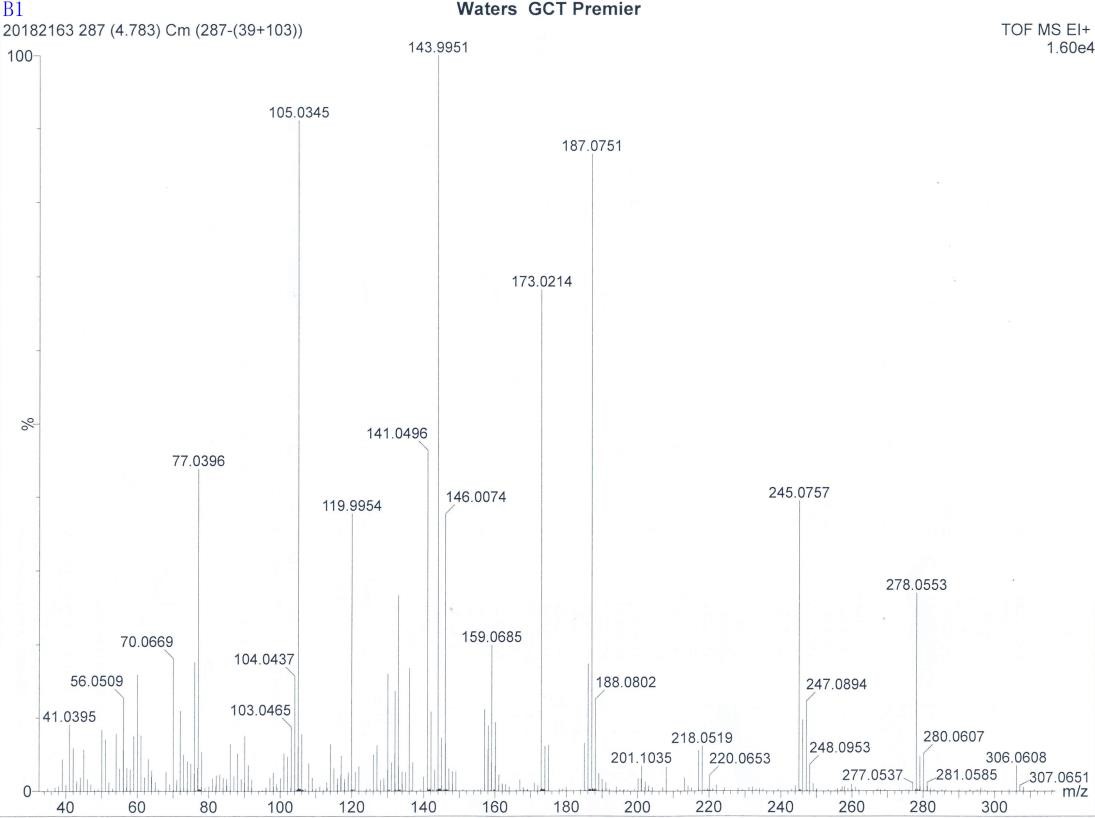


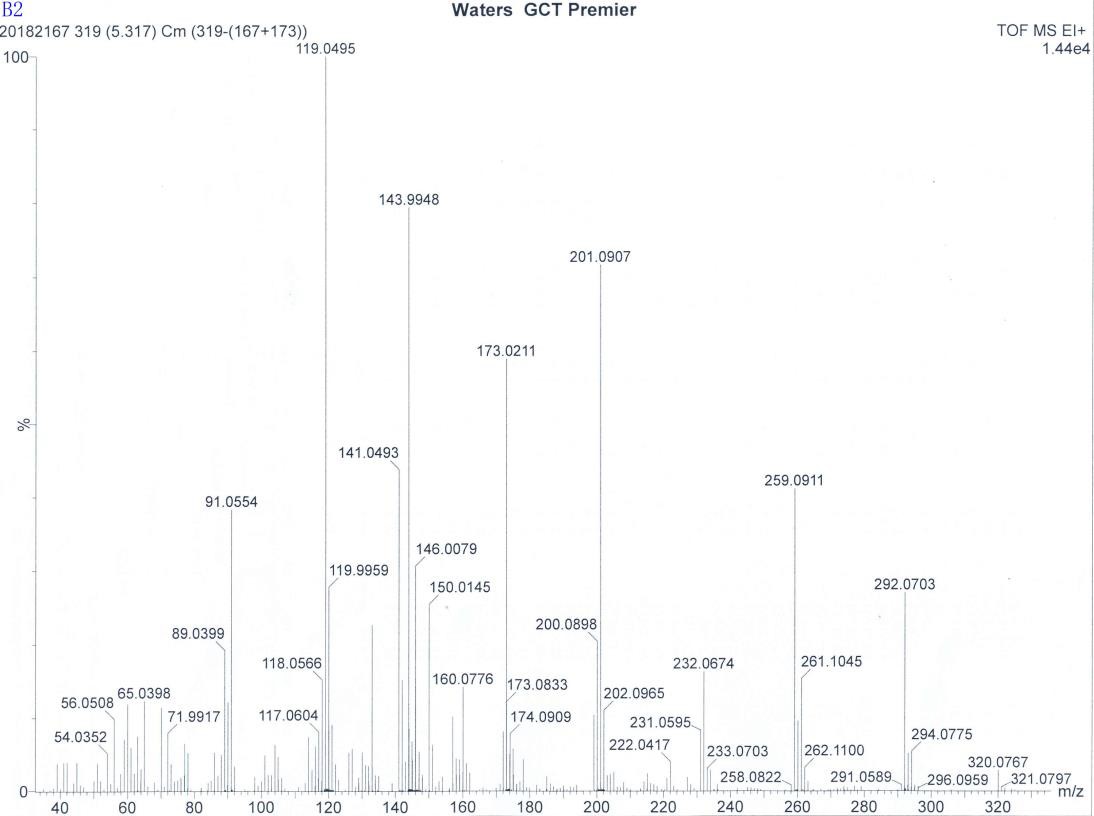


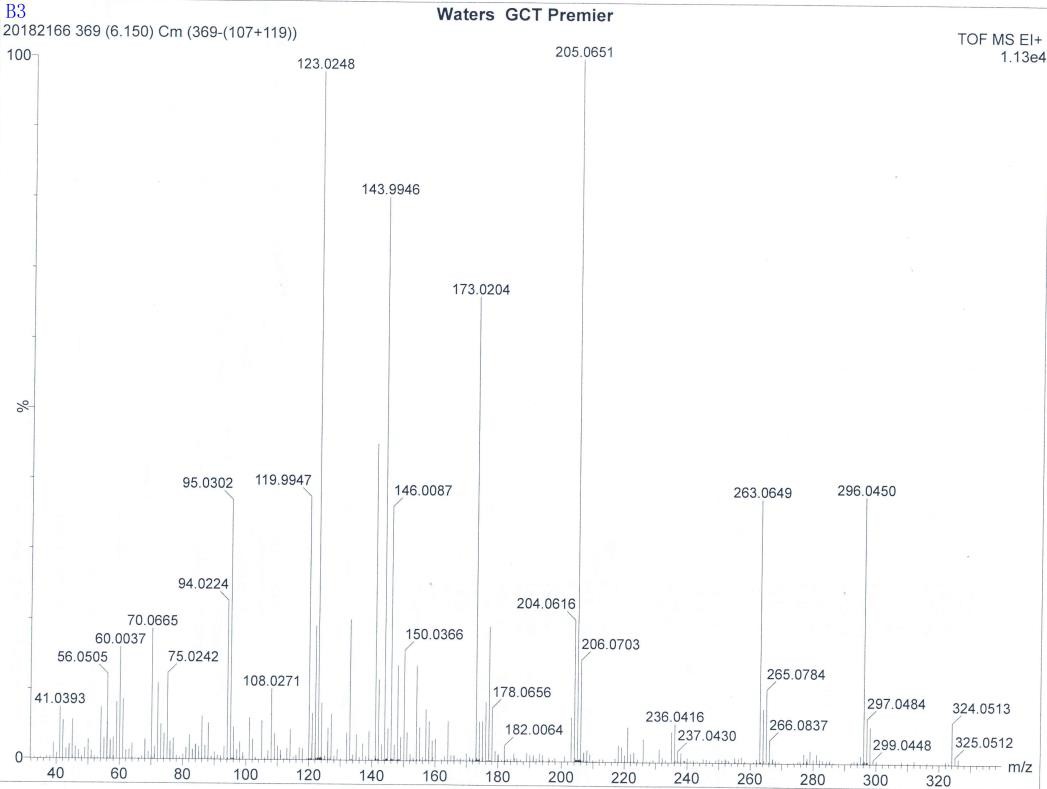


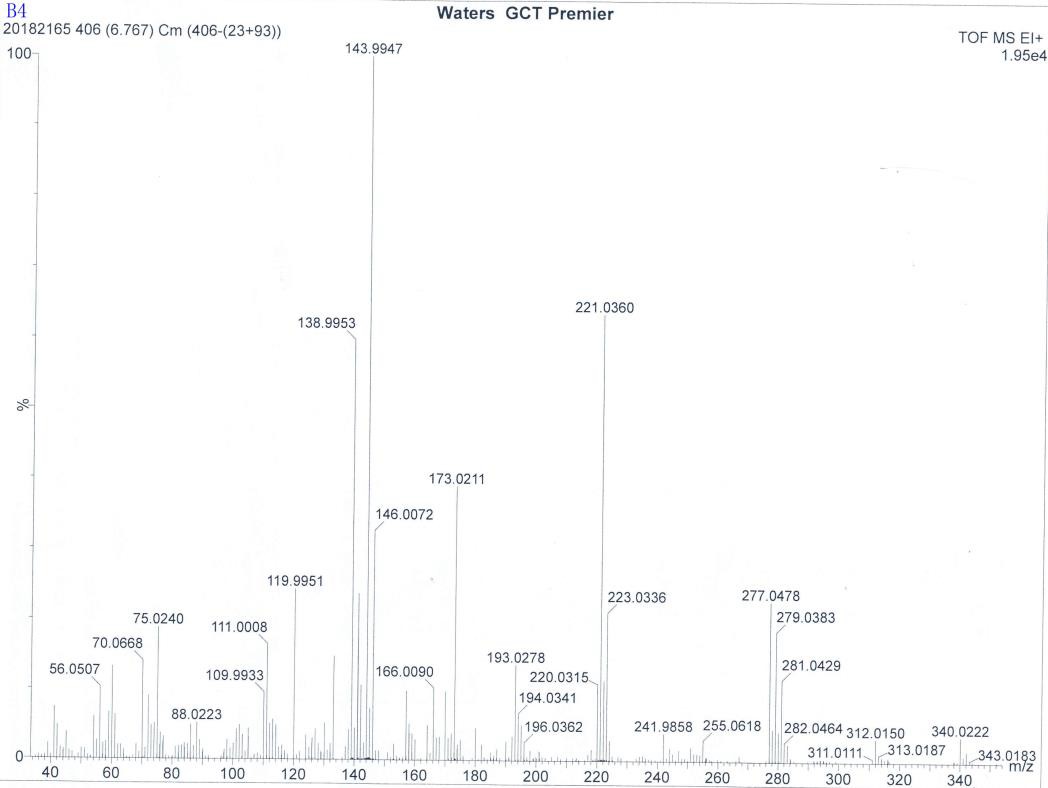


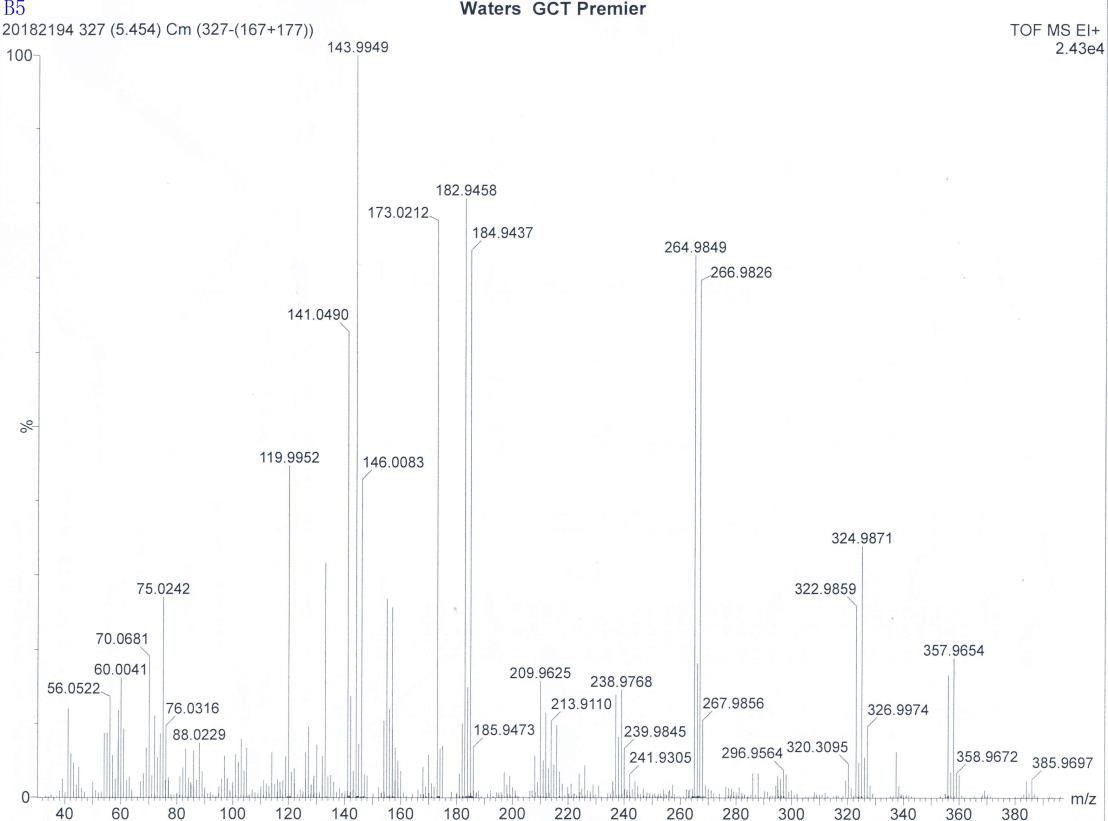


**Table S 1. Control Efficacy of Compounds A1-A18 and B1-B5 against the Cucumber Root- knot Nematode Disease Caused by *M. incognita* in Test Tubes.**


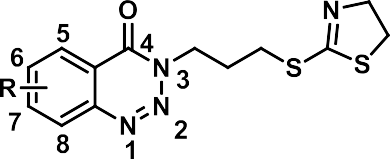

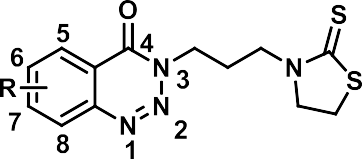


| **Compd.** | **R** | **J2 of *M. incognita* inhibition (%)** | | |  |
| --- | --- | --- | --- | --- | --- |
|  |  | **20.0 mg L-1** | **10.0 mg L-1** | **5.0 mg L-1** | **1.0 mg L-1** |
| **A1** | **H** | **50.3** | **n.t.** | **n.t.** | **n.t.** |
| **A2** | **5-OCH3** | **9.0** | **n.t.** | **n.t.** | **n.t.** |
| **A3** | **6-OCH3** | **29.3** | **n.t.** | **n.t.** | **n.t.** |

| **A4** | **7-OCH3** | **80.0** | **n.t.** | **n.t.** | **n.t.** |
| --- | --- | --- | --- | --- | --- |
| **A5** | **8-OCH3** | **0** | **n.t.** | **n.t.** | **n.t.** |
| **A6** | **5-NO2** | **61.0** | **n.t.** | **n.t.** | **n.t.** |
| **A7** | **6-NO2** | **70.0** | **n.t.** | **n.t.** | **n.t.** |
| **A8** | **7-NO2** | **0** | **n.t.** | **n.t.** | **n.t.** |
| **A9** | **8-NO2** | **9.8** | **n.t.** | **n.t.** | **n.t.** |
| **A10** | **5-Cl** | **0** | **n.t.** | **n.t.** | **n.t.** |
| **A11** | **6-Cl** | **0** | **n.t.** | **n.t.** | **n.t.** |
| **A12** | **7-Cl** | **100.0** | **95.7** | **80** | **68.3** |
| **A13** | **8-Cl** | **0** | **n.t.** | **n.t.** | **n.t.** |
| **A14** | **7-CH3** | **0** | **n.t.** | **n.t.** | **n.t.** |
| **A15** | **7-F** | **0** | **n.t.** | **n.t.** | **n.t.** |
| **A16** | **7-Br** | **pta** | **76.3** | **52.5** | **n.t.** |
| **A17** | **7-I** | **0** | **n.t.** | **n.t.** | **n.t.** |
| **A18** | **7-CF3** | **55.6** | **n.t.** | **n.t.** | **n.t.** |
| **B1** | **H** | **0** | **n.t.** | **n.t.** | **n.t.** |
| **B2** | **7-CH3** | **0** | **n.t.** | **n.t.** | **n.t.** |
| **B3** | **7-F** | **0** | **n.t.** | **n.t.** | **n.t.** |
| **B4** | **5-Cl** | **0** | **n.t.** | **n.t.** | **n.t.** |
| **B5** | **7-Br** | **0** | **n.t.** | **n.t.** | **n.t.** |
| **FMb** |  | **100.0** | **100.0** | **100.0** | **100.0** |
| **AVMc** |  | **100.0** | **100.0** | **100.0** | **100.0** |
| **Blank control** |  | **0** | **0** | **0** | **0** |
| **apt = phytotoxic. bFM = fenamiphos. cAVM = avermectin. n.t.: not tested.**  **Table S 2. Crystal data and structure refinement for A1.**  Identification code SC226_CXL_0m_a  Empirical formula C13 H14 N4 O S2  Formula weight 306.40  Temperature 298(2) K | | | | |  |

| Wavelength 1.54178 Å |
| --- |
| Crystal system Monoclinic |
| Space group P2**1**/n |
| Unit cell dimensions a = 7.9833(10) Å = 90°.  b = 12.8346(15) Å = 102.450(6)°.  c = 14.2537(17) Å  = 90°. |
| Volume 1426.1(3) Å3 |
| Z 4 |
| Density (calculated) 1.427 Mg/m3 |
| Absorption coefficient 3.398 mm-1 |
| F(000) 640 |
| Crystal size 0.220 x 0.210 x 0.180 mm3 |
| Theta range for data collection 4.686 to 66.998°. |
| Index ranges -9<=h<=9, -15<=k<=15, -16<=l<=17 |
| Reflections collected 10300 |
| Independent reflections 2520 [R(int) = 0.0707] |
| Completeness to theta = 66.998° 99.2 % |
| Refinement method Full-matrix least-squares on F2 |
| Data / restraints / parameters 2520 / 28 / 270 |
| Goodness-of-fit on F2 1.074 |
| Final R indices [I>2sigma(I)] R1 = 0.0454, wR2 = 0.1151 |
| R indices (all data) R1 = 0.0561, wR2 = 0.1232 |
| Extinction coefficient 0.0079(7) |
| Largest diff. peak and hole 0.239 and -0.251 e.Å-3 |

# Table S 3. Atomic coordinates ( x 104) and equivalent isotropic displacement parameters (Å2x 103) for A1. U(eq) is defined as one third of the trace of the orthogonalized Uij tensor.

x y z U(eq)

| C(8) | 6462(4) | 5488(2) | 1835(2) | 54(1) |
| --- | --- | --- | --- | --- |
| C(9) | 5255(3) | 4631(2) | 1976(2) | 47(1) |
| C(10) | 6268(3) | 3650(2) | 2267(2) | 49(1) |
| C(11) | 5199(3) | 2358(2) | 3569(2) | 42(1) |
| C(12) | 5947(5) | 2573(3) | 5169(2) | 70(1) |
| C(13) | 5067(7) | 1541(3) | 5143(2) | 88(1) |
| N(4) | 6027(3) | 2941(2) | 4213(2) | 56(1) |
| S(1) | 4961(1) | 2512(1) | 2336(1) | 53(1) |
| S(2) | 4188(1) | 1240(1) | 3914(1) | 58(1) |
| C(1) | 3380(10) | 8873(5) | -131(2) | 66(2) |
| C(2) | 2845(12) | 9744(4) | 304(4) | 70(2) |
| C(3) | 3052(9) | 9779(4) | 1297(4) | 62(2) |
| C(4) | 3794(7) | 8942(4) | 1855(2) | 53(2) |
| C(5) | 4329(5) | 8071(3) | 1419(3) | 41(1) |
| C(6) | 4122(7) | 8037(3) | 426(3) | 49(1) |
| C(7) | 5101(5) | 7190(4) | 1972(4) | 45(1) |
| N(1) | 4690(6) | 7194(4) | -32(2) | 64(1) |
| N(2) | 5410(9) | 6426(6) | 444(4) | 61(2) |
| N(3) | 5674(9) | 6444(5) | 1428(6) | 42(1) |
| O(1) | 5279(11) | 7077(6) | 2828(5) | 68(2) |

| C(1A) | 3440(20) | 9347(10) | 1800(11) | 55(4) |
| --- | --- | --- | --- | --- |
| C(2A) | 2830(40) | 9923(16) | 979(12) | 89(7) |
| C(3A) | 2880(40) | 9516(14) | 88(12) | 71(5) |
| C(4A) | 3620(30) | 8557(13) | 32(8) | 67(5) |
| C(5A) | 4260(14) | 7981(7) | 857(7) | 37(3) |
| C(6A) | 4181(17) | 8372(8) | 1745(6) | 41(3) |
| C(7A) | 4968(13) | 6960(7) | 804(6) | 51(3) |
| N(1A) | 4752(11) | 7805(7) | 2586(5) | 52(3) |
| N(2A) | 5460(30) | 6930(12) | 2556(10) | 55(5) |
| N(3A) | 5450(30) | 6479(13) | 1679(11) | 49(6) |
| O(1A) | 5030(20) | 6496(12) | 79(8) | 70(4) |
